# Supplementary material for: Bacterial Infection Drives the Expression Dynamics of microRNAs and Their isomiRs
Source: PLoS Genet. 2015 Mar 20;11(3):e1005064. doi: 10.1371/journal.pgen.1005064 (PMC4368565; doi:10.1371/journal.pgen.1005064)
Supplement: S4 Table — (XLSX) [file pgen.1005064.s014.xlsx]

## Sheet: S4
Table S4. 50 most enriched Gene Ontology biological processes in high-confidence predicted targets of up-regulated core response miRNAs
GO category	Description	Proportion of target genes in category	p-value	adjusted p-value
GO:0045216	cell-cell junction organization	0.00525624	0.0008	0.2418
GO:0007155	cell adhesion	0.0157687	0.0011	0.2418
GO:0034329	cell junction assembly	0.00525624	0.0012	0.2418
GO:0007565	female pregnancy	0.00262812	0.0012	0.2418
GO:0071222	cellular response to lipopolysaccharide	0.0043802	0.0015	0.2418
GO:0006367	transcription initiation from RNA polymerase II promoter	0.0162067	0.0019	0.2418
GO:0006024	glycosaminoglycan biosynthetic process	0.0043802	0.002	0.2418
GO:0048387	negative regulation of retinoic acid receptor signaling pathway	0.00175208	0.0022	0.2418
GO:0030177	positive regulation of Wnt signaling pathway	0.0043802	0.0024	0.2418
GO:0042692	muscle cell differentiation	0.0087604	0.0028	0.2418
GO:0071364	cellular response to epidermal growth factor stimulus	0.0021901	0.0029	0.2418
GO:0051276	chromosome organization	0.00262812	0.0031	0.2418
GO:0030216	keratinocyte differentiation	0.00262812	0.0034	0.2448
GO:0090090	negative regulation of canonical Wnt signaling pathway	0.00569426	0.0038	0.254057
GO:0000184	nuclear-transcribed mRNA catabolic process, nonsense-mediated decay	0.0021901	0.0054	0.287486
GO:0001933	negative regulation of protein phosphorylation	0.00306614	0.0055	0.287486
GO:0021762	substantia nigra development	0.00175208	0.0064	0.287486
GO:0043085	positive regulation of catalytic activity	0.00481822	0.0065	0.287486
GO:0055007	cardiac muscle cell differentiation	0.0021901	0.0065	0.287486
GO:0016337	cell-cell adhesion	0.0043802	0.0069	0.287486
GO:0045931	positive regulation of mitotic cell cycle	0.00306614	0.0072	0.287486
GO:0035690	cellular response to drug	0.00306614	0.0073	0.287486
GO:0048813	dendrite morphogenesis	0.00262812	0.0073	0.287486
GO:0010575	positive regulation vascular endothelial growth factor production	0.0043802	0.0076	0.287486
GO:0007286	spermatid development	0.0043802	0.0081	0.287486
GO:0043124	negative regulation of I-kappaB kinase/NF-kappaB signaling	0.00525624	0.0085	0.287486
GO:0007156	homophilic cell adhesion	0.0043802	0.0085	0.287486
GO:0071805	potassium ion transmembrane transport	0.0021901	0.0086	0.287486
GO:0032870	cellular response to hormone stimulus	0.0021901	0.0092	0.29016
GO:0045214	sarcomere organization	0.00350416	0.0093	0.29016
GO:0043065	positive regulation of apoptotic process	0.0135786	0.0106	0.295978
GO:0000724	double-strand break repair via homologous recombination	0.00131406	0.0108	0.295978
GO:0030513	positive regulation of BMP signaling pathway	0.00175208	0.0111	0.295978
GO:0010467	gene expression	0.0236531	0.0112	0.295978
GO:0031647	regulation of protein stability	0.00175208	0.0113	0.295978
GO:0070373	negative regulation of ERK1 and ERK2 cascade	0.00131406	0.0114	0.295978
GO:0007568	aging	0.00744634	0.0117	0.295978
GO:0050715	positive regulation of cytokine secretion	0.00131406	0.0131	0.305314
GO:0060548	negative regulation of cell death	0.00306614	0.0133	0.305314
GO:0045944	positive regulation of transcription from RNA polymerase II promoter	0.0455541	0.0135	0.305314
GO:0001843	neural tube closure	0.00832238	0.0137	0.305314
GO:0042104	positive regulation of activated T cell proliferation	0.00131406	0.0137	0.305314
GO:0032321	positive regulation of Rho GTPase activity	0.00175208	0.0156	0.316368
GO:0032720	negative regulation of tumor necrosis factor production	0.00131406	0.0161	0.316368
GO:0051291	protein heterooligomerization	0.00525624	0.0165	0.316368
GO:0030155	regulation of cell adhesion	0.00481822	0.0165	0.316368
GO:0001558	regulation of cell growth	0.00350416	0.0166	0.316368
GO:0019827	stem cell maintenance	0.00262812	0.0167	0.316368
GO:0007268	synaptic transmission	0.0100745	0.0169	0.316368
GO:0051924	regulation of calcium ion transport	0.0021901	0.0169	0.316368
GO:0007131	reciprocal meiotic recombination	0.00131406	0.0175	0.31824
