# Supplementary material for: Bacterial Infection Drives the Expression Dynamics of microRNAs and Their isomiRs
Source: PLoS Genet. 2015 Mar 20;11(3):e1005064. doi: 10.1371/journal.pgen.1005064 (PMC4368565; doi:10.1371/journal.pgen.1005064)
Supplement: S6 Table — (XLSX) [file pgen.1005064.s016.xlsx]

## Sheet: S6
Table S6. Differential expression of the miR-132/212 family following infection with the extended MTBC panel
miR-132-3p
	BCG	BCG::RD1	MTB	MTB-Ra	MTB-HK	BTB
BCG	NA
BCG::RD1	0.03125	NA
MTB	0.03125	0.6875	NA
MTB-Ra	0.03125	0.03125	0.03125	NA
MTB-HK	1	0.03125	0.0625	0.21875	NA
BTB	0.03125	0.6875	0.5625	0.03125	0.03125	NA
miR-212-3p
	BCG	BCG::RD1	MTB	MTB-Ra	MTB-HK	BTB
BCG	NA
BCG::RD1	0.03125	NA
MTB	0.03125	0.0625	NA
MTB-Ra	0.0625	0.84375	0.15625	NA
MTB-HK	0.3125	1	0.6875	0.84375	NA
BTB	0.09375	0.09375	0.84375	0.3125	0.5625	NA
