# Supplementary material for: Bacterial Infection Drives the Expression Dynamics of microRNAs and Their isomiRs
Source: PLoS Genet. 2015 Mar 20;11(3):e1005064. doi: 10.1371/journal.pgen.1005064 (PMC4368565; doi:10.1371/journal.pgen.1005064)
Supplement: S9 Table — (XLSX) [file pgen.1005064.s019.xlsx]

## Sheet: S9
Table S9. List of expressed miRNAs with p-values and DST statistics reflecting infection-induced changes in isomiR distribution
	BCG						MTB						BTB						SLM						YRS
ID	4h		18h		48h		4h		18h		48h		4h		18h		48h		4h		18h		48h		4h		18h		48h
	FCT	P-value	FCT	P-value	FCT	P-value	FCT	P-value	FCT	P-value	FCT	P-value	FCT	P-value	FCT	P-value	FCT	P-value	FCT	P-value	FCT	P-value	FCT	P-value	FCT	P-value	FCT	P-value	FCT	P-value
hsa-let-7b-3p	0.0709413	0.3021	0.515823	0.0261	0.636704	0.0002	-0.0147421	0.5179	0.57252	0.0018	0.753595	0	0.110011	0.1663	0.481027	0.0053	0.795688	0	0.0221413	0.4332	0.482773	0.0148	0.42889	0.0103	0.00445433	0.4871	0.774347	0	0.771967	0
hsa-let-7b-5p	-0.000706323	0.4926	-0.00272397	0.5036	0.386114	0.0298	-0.014063	0.5183	0.036944	0.4434	0.483547	0.0047	0.0241594	0.4095	0.0441588	0.4479	0.580927	0.0093	-0.013635	0.5205	0.0868827	0.3049	0.256726	0.1147	-0.0322673	0.5615	0.223837	0.0644	0.584939	0.0016
hsa-let-7c-5p	-0.0284808	0.5371	0.159083	0.3313	0.35882	0.0194	-0.0546592	0.5577	0.184813	0.2928	0.542782	0.0016	-0.0289519	0.5527	0.157625	0.3418	0.610367	0.0019	-0.0530532	0.5964	0.262753	0.06	0.249009	0.1847	-0.0681383	0.5653	0.410706	0.0109	0.606521	0.0004
hsa-let-7d-3p	-0.0194993	0.5423	0.377593	0.0715	0.65807	0.0019	0.00322203	0.4839	0.382617	0.059	0.739863	0.0001	-0.00865479	0.5185	0.333151	0.082	0.781137	0.0002	-0.0268172	0.5657	0.42359	0.0287	0.438227	0.0194	-0.0155226	0.5382	0.701439	0	0.769423	0.0001
hsa-let-7d-5p	-0.0461633	0.5896	-0.0221819	0.5275	0.196687	0.2478	-0.0523101	0.5616	-0.0262698	0.5283	0.298321	0.0709	-0.00490875	0.4983	-0.00175412	0.5074	0.414654	0.0676	-0.0508426	0.5937	0.0966715	0.2806	0.170324	0.3082	-0.0728945	0.5815	0.134498	0.182	0.513865	0.0127
hsa-let-7e-3p	-0.000116915	0.5007	0.162091	0.1608	0.0950982	0.3623	0.00466753	0.4866	0.0494992	0.3788	0.249782	0.0626	-0.00266006	0.5103	0.10393	0.2997	0.167075	0.0976	0.0792973	0.2903	0.104855	0.2883	0.139128	0.111	0.0774617	0.3093	0.165247	0.1372	0.238574	0.0262
hsa-let-7e-5p	-0.0495935	0.6103	-0.041342	0.5519	0.199467	0.213	-0.0607952	0.6278	0.00810814	0.4894	0.30528	0.0575	-0.0385423	0.5903	0.0154448	0.4792	0.361791	0.0296	-0.0635606	0.6356	0.0838735	0.2953	0.186546	0.2538	-0.0605793	0.6132	0.115555	0.2309	0.508838	0.0016
hsa-let-7f-1-3p	0.0642863	0.3297	0.461948	0.0119	0.529095	0.001	0.00355255	0.4852	0.467484	0.0028	0.673223	0.0001	0.233162	0.0326	0.516713	0.0029	0.696396	0	-0.0196946	0.5393	0.485585	0.0251	0.401753	0.0116	0.0431234	0.3687	0.674265	0	0.675337	0.0001
hsa-let-7f-2-3p	0.0107225	0.4719	0.0879338	0.3164	0.427293	0.056	0.0095614	0.4745	0.0459232	0.431	0.567842	0.0003	-0.0109711	0.5203	0.055085	0.4036	0.599929	0.0005	0.0300291	0.4541	0.13462	0.3322	0.305921	0.1718	-0.0248526	0.5352	0.441712	0.0096	0.554586	0.0033
hsa-let-7g-3p	0.0588169	0.3865	0.00961202	0.4498	0.0569195	0.369	-0.0176825	0.5455	-0.0010558	0.497	0.121943	0.2354	-0.00263647	0.4997	-0.019711	0.5508	0.160487	0.1214	-0.0333176	0.5608	0.0851846	0.2331	0.0215713	0.4419	0.00300704	0.4673	0.0842479	0.2948	0.161801	0.2295
hsa-let-7g-5p	-0.0487046	0.5751	-0.0537256	0.5569	0.0267457	0.4745	-0.075749	0.5812	-0.0708753	0.5664	0.107906	0.3187	-0.044038	0.5781	-0.0664829	0.577	0.19275	0.3255	-0.055342	0.5897	0.0104327	0.4669	0.0657941	0.4288	-0.0797848	0.5735	0.0195033	0.439	0.303336	0.162
hsa-let-7i-3p	0.0857107	0.2932	0.166283	0.1196	0.69852	0	-0.0291354	0.541	0.102059	0.2861	0.702917	0.0074	0.0976936	0.1952	0.143927	0.1612	0.758661	0	0.0251526	0.4034	0.329897	0.0416	0.450765	0.0155	0.0536769	0.3719	0.410469	0.0278	0.754781	0
hsa-let-7i-5p	-0.0508666	0.5965	0.0282629	0.4705	0.0804799	0.416	-0.0683449	0.5665	0.0613689	0.3981	0.138727	0.1815	-0.0379662	0.5762	0.068941	0.4146	0.236538	0.2259	-0.0186774	0.5279	0.00655615	0.483	0.046618	0.4355	-0.0410736	0.5539	0.0655022	0.3457	0.220824	0.1046
hsa-miR-100-5p	-0.0163524	0.5333	0.0238045	0.4701	0.232909	0.1611	-0.0252495	0.55	0.0193443	0.4522	0.314137	0.0308	-0.0267366	0.5378	0.0320298	0.4462	0.360432	0.0761	-0.0220702	0.5434	0.12977	0.242	0.157571	0.2441	-0.00626985	0.5101	0.204694	0.1156	0.357894	0.0159
hsa-miR-101-5p	-0.00895316	0.5253	0.106291	0.2025	0.232298	0.0286	-0.0399102	0.5932	0.11926	0.2405	0.271627	0.0318	0.00788955	0.4861	0.107323	0.1734	0.341969	0.0042	-0.022695	0.547	0.0164864	0.4475	0.186615	0.1129	-0.0272456	0.5616	0.180518	0.0737	0.327151	0.0121
hsa-miR-106b-3p	0.0175171	0.4284	0.0873833	0.2586	0.467846	0.0014	-0.0053147	0.5001	0.115893	0.2092	0.542373	0.0029	-0.0343146	0.5832	0.108513	0.2926	0.555508	0.0076	-0.0203997	0.5613	0.140689	0.3228	0.306412	0.1102	-0.0162131	0.5424	0.268334	0.0557	0.590742	0.0005
hsa-miR-106b-5p	-0.0040087	0.4996	0.017044	0.4743	0.114529	0.2421	-0.0151863	0.5237	0.131857	0.1428	0.161398	0.1411	-0.0372753	0.5509	0.0614385	0.3624	0.120591	0.1775	-0.0247983	0.5581	0.0072013	0.4594	0.067302	0.2946	0.043458	0.401	0.0605917	0.3722	0.178748	0.2118
hsa-miR-107	-0.0278672	0.5554	0.0107936	0.4837	0.482487	0.0113	-0.0115018	0.5181	0.010022	0.4912	0.707248	0.0002	0.0227967	0.4637	0.0239171	0.4563	0.742279	0.0002	-0.0230248	0.5532	0.201701	0.1829	0.366612	0.0242	-0.0183117	0.5269	0.406191	0.0764	0.762327	0
hsa-miR-10a-5p	-0.0457684	0.6372	0.131727	0.2515	0.590638	0.0007	-0.0172269	0.5222	0.118556	0.1602	0.602831	0.0011	-0.00132921	0.4947	0.120773	0.3012	0.7016	0	-0.0453972	0.6117	0.198211	0.2086	0.310875	0.0686	0.0128119	0.4303	0.574179	0	0.720598	0.0003
hsa-miR-1226-3p	-0.0139605	0.5207	-0.0122459	0.5294	0.0348764	0.4602	-0.0216	0.5404	-0.0297532	0.5689	0.0626067	0.3384	-0.0344915	0.5799	0.00433496	0.4968	0.100816	0.2476	-0.0357068	0.6007	-0.00437594	0.5117	0.0136985	0.4634	-0.0384837	0.5965	0.0639369	0.3232	0.177244	0.1024
hsa-miR-1227-3p	0.00107126	0.4965	-0.00930759	0.5248	0.0351755	0.4086	0.0242429	0.4376	-0.0289489	0.5733	0.00475227	0.4772	0.00314966	0.4763	-0.022378	0.5494	0.00406843	0.4914	0.003198	0.4876	-0.037717	0.5668	-0.0104325	0.5262	-0.0191183	0.5516	-0.00759346	0.5122	0.0186008	0.4525
hsa-miR-1237-3p	0.0513246	0.3473	0.055218	0.2856	0.0410158	0.3637	-0.0287971	0.5489	-0.0162897	0.5295	0.0234473	0.4179	0.0213428	0.4403	0.0181767	0.4464	0.0293484	0.4026	-0.00883925	0.5118	0.0145086	0.4574	0.039494	0.3891	-0.0122657	0.5341	0.0417369	0.3771	0.0110692	0.4601
hsa-miR-1249	-0.042766	0.5728	0.27605	0.0482	0.436124	0.0058	-0.0209958	0.5418	0.409025	0.0025	0.634884	0.0001	-0.0298845	0.562	0.403111	0.0054	0.611256	0.0001	-0.0322058	0.5697	0.424094	0.0123	0.440126	0.0376	-0.0563625	0.5945	0.550605	0.0008	0.534342	0.0007
hsa-miR-125a-3p	-0.0381579	0.59	0.0166423	0.474	-0.00264407	0.503	-0.0106974	0.5149	0.0172651	0.4213	0.0418318	0.3608	-0.0216257	0.5519	0.031955	0.386	0.0196738	0.4377	-0.0455837	0.6022	-0.00145419	0.5022	0.0127119	0.4823	-0.0308063	0.5706	0.000651819	0.4918	0.0490979	0.3589
hsa-miR-125a-5p	-0.020659	0.5236	-0.0308069	0.5317	0.073475	0.4035	-0.00875119	0.5041	-0.0579472	0.6119	0.150035	0.2253	-0.0590718	0.5832	-0.0241715	0.5346	0.153094	0.1834	-0.0331381	0.559	0.0223285	0.4616	0.0891268	0.2703	-0.060048	0.6335	0.0196779	0.4806	0.189962	0.2718
hsa-miR-125b-2-3p	-0.0371367	0.5674	0.317261	0.0542	0.512538	0.0051	0.0465585	0.4397	0.483595	0.0008	0.754514	0.0001	0.00582926	0.4866	0.438267	0.0326	0.698069	0.0002	0.00407463	0.4932	0.335608	0.069	0.37191	0.0287	-0.0391258	0.5616	0.547304	0.0015	0.655654	0.0004
hsa-miR-126-3p	0.0120968	0.4567	-0.00964602	0.52	0.169063	0.1075	0.022547	0.4402	-0.0237405	0.5663	0.345668	0.0089	-0.0055795	0.5037	0.0155436	0.4516	0.296229	0.0177	0.0185805	0.4151	0.0452767	0.4264	0.151749	0.1911	0.0616046	0.2917	0.170226	0.0909	0.400233	0.0022
hsa-miR-126-5p	0.0305653	0.4152	0.0143348	0.4579	0.041365	0.3966	-0.0330404	0.6005	0.0160599	0.47	0.262064	0.0736	0.00348182	0.4768	-0.0135115	0.5312	0.150452	0.2832	0.086381	0.2769	0.00986791	0.4662	0.138653	0.1413	-0.00560651	0.5079	0.094877	0.2999	0.271225	0.1217
hsa-miR-1260a	0.0642303	0.3024	0.0743491	0.3278	0.137751	0.1496	0.000221881	0.4901	0.0452513	0.4144	0.180805	0.1396	-0.0304129	0.5608	0.171744	0.1697	0.275727	0.074	0.00172442	0.4843	0.0522419	0.355	0.0308288	0.4227	-0.0109438	0.5079	-0.0275275	0.55	0.16487	0.285
hsa-miR-1260b	0.00300296	0.4912	0.0349893	0.4255	0.158135	0.2082	-0.0130268	0.5161	0.130837	0.2264	0.198901	0.1267	-0.00451312	0.5058	0.0829997	0.3555	0.226328	0.1265	-0.0297639	0.5749	0.115848	0.2411	0.178053	0.1369	-0.0411662	0.5596	0.111547	0.2252	0.247407	0.1647
hsa-miR-1271-5p	-0.0546257	0.6345	0.0863078	0.3579	0.19209	0.1055	0.0103957	0.4837	0.0239088	0.4564	0.246342	0.0893	-0.0127763	0.5265	0.0311248	0.4554	0.394228	0.0091	-0.0279897	0.5656	0.164618	0.1355	0.127714	0.1806	-0.0165311	0.5305	0.339742	0.0367	0.235102	0.2331
hsa-miR-1276	0.0420962	0.3768	0.247223	0.0445	0.328723	0.0218	0.0810176	0.2197	0.0316439	0.4497	0.468713	0.0008	-0.0274324	0.5513	0.264736	0.1422	0.485181	0.0048	-0.0272578	0.5609	0.251367	0.0814	0.220253	0.1718	-0.0334025	0.5824	0.528989	0.0005	0.578482	0.0067
hsa-miR-128-1-5p	0.0174927	0.4554	7.92167e-05	0.5035	0.0143221	0.4886	0.0259396	0.4378	0.023635	0.4566	0.125529	0.1728	-0.0282042	0.5567	0.0305826	0.428	0.149585	0.1294	0.0131227	0.4709	0.0329032	0.4228	0.0785335	0.3276	0.0362897	0.447	0.119248	0.2742	0.204506	0.0526
hsa-miR-1296-5p	-0.031679	0.5891	0.421641	0.0016	0.279342	0.0823	-0.0314397	0.5847	0.390504	0.0025	0.489806	0.0006	-0.0107114	0.5195	0.368796	0.081	0.448094	0.0011	-0.0291119	0.5681	0.399325	0.0255	0.340078	0.0083	-0.023678	0.5618	0.505541	0.0008	0.230516	0.1503
hsa-miR-1298-5p	0.0128639	0.4759	0.0304999	0.4527	0.00796243	0.4719	-0.0733485	0.589	-0.0128479	0.5188	0.00372572	0.4794	0.0749303	0.3218	0.00664054	0.4943	0.0140072	0.469	0.0646084	0.4044	0.0267959	0.4396	-0.046026	0.6035	0.00688916	0.491	0.0315333	0.4247	0.144751	0.2551
hsa-miR-1301-3p	-0.0184022	0.542	0.28548	0.0258	0.480182	0.0002	-0.0155737	0.5231	0.254347	0.0211	0.51479	0.0002	-0.0308493	0.5896	0.217565	0.0754	0.541088	0.0008	-0.0299351	0.5651	0.34845	0.0119	0.346322	0.063	-0.0264782	0.564	0.56725	0	0.503038	0.0011
hsa-miR-1306-5p	-0.0038301	0.5045	0.00652026	0.4768	0.315496	0.0099	-0.00913839	0.5247	-0.0120908	0.5277	0.358483	0.0115	0.02149	0.4565	0.0379052	0.3918	0.473599	0.0019	-0.0194308	0.5441	0.10947	0.2412	0.27135	0.046	-0.0416321	0.5992	0.266539	0.0496	0.528262	0.0004
hsa-miR-1307-3p	-0.033834	0.5806	0.467965	0.0012	0.650209	0	-0.0232589	0.5576	0.365736	0.0084	0.698734	0.0002	-0.0457782	0.5904	0.426069	0.003	0.748062	0	-0.0306106	0.5795	0.407669	0.0454	0.429384	0.019	-0.0304919	0.5708	0.678696	0	0.749753	0.0001
hsa-miR-1307-5p	-0.0362655	0.5639	0.524105	0.0027	0.668098	0.0009	-0.043438	0.5937	0.516974	0.0113	0.774117	0	-0.0486791	0.6135	0.552269	0.0013	0.755093	0.0001	-0.0291479	0.5588	0.499871	0.02	0.500044	0.0691	-0.0285677	0.5782	0.770939	0	0.782526	0
hsa-miR-130a-3p	0.0213363	0.4467	0.121789	0.2409	0.167638	0.2344	-0.0483443	0.5703	0.0639733	0.3093	0.536334	0.0015	0.0119492	0.4515	0.0501624	0.4343	0.594991	0.0001	-0.0313787	0.5761	0.0312764	0.4219	0.311561	0.1098	0.0234107	0.4643	0.25878	0.2344	0.390702	0.1999
hsa-miR-130b-5p	-0.0353571	0.5713	0.239009	0.1389	0.478046	0.0091	-0.0354721	0.5726	0.179913	0.1715	0.62372	0.0001	-0.0469288	0.6007	0.233645	0.0608	0.610341	0.0002	-0.0442155	0.5824	0.378799	0.0312	0.358757	0.0454	-0.0467668	0.5934	0.523062	0.0031	0.63606	0.0001
hsa-miR-132-3p	0.127382	0.2099	0.223804	0.1085	0.475896	0.0095	0.299277	0.1147	0.303596	0.0617	0.569946	0.0022	0.205827	0.1255	0.389174	0.0046	0.654593	0.0004	0.00782166	0.4936	0.169309	0.1739	0.292166	0.1345	-0.0279872	0.5488	0.371975	0.0787	0.602449	0.0011
hsa-miR-132-5p	0.0291925	0.44	0.0387788	0.4513	0.460852	0.0013	0.188468	0.2341	0.0278051	0.4313	0.543411	0.0001	0.0997075	0.2881	0.0139775	0.477	0.650748	0.0029	-0.00342723	0.5038	0.134615	0.1705	0.264595	0.1353	-0.0188943	0.5241	0.409654	0.0047	0.620546	0.0004
hsa-miR-1343-3p	5.10933e-05	0.4941	0.143444	0.1659	0.34218	0.0194	0.0270713	0.3913	0.133618	0.1493	0.408236	0.0091	-0.0232385	0.5508	0.178267	0.1345	0.489949	0.0039	-0.00207792	0.4951	0.231572	0.0457	0.172639	0.1985	-0.0276462	0.5544	0.422433	0.0023	0.422754	0.001
hsa-miR-140-3p	-0.0316676	0.5851	0.186609	0.1068	0.555722	0.0009	-0.0274351	0.5402	0.241115	0.044	0.645483	0.0003	-0.0132183	0.5387	0.192945	0.0796	0.718685	0	-0.0122077	0.5236	0.209384	0.1092	0.365647	0.0833	0.0152682	0.4497	0.46176	0.0042	0.679841	0.0001
hsa-miR-140-5p	-0.00722364	0.5082	0.0254791	0.4488	0.128032	0.2338	-0.019062	0.5324	-0.0265072	0.5463	0.238078	0.0577	-0.0333191	0.5792	-0.0301874	0.5493	0.223877	0.0681	0.00120377	0.4906	-0.00526039	0.5041	0.106125	0.2402	-0.0182854	0.5264	-0.00186495	0.5057	0.351102	0.0235
hsa-miR-141-3p	0.00338417	0.493	0.225704	0.0844	0.65931	0.0002	0.0301833	0.4467	0.282521	0.1442	0.667159	0.0001	-0.0229554	0.5395	0.319975	0.01	0.70353	0	-0.0107058	0.5206	0.299615	0.0919	0.408833	0.1283	-0.0365937	0.5828	0.508503	0.0114	0.714265	0
hsa-miR-142-3p	-0.040187	0.6002	-0.0149016	0.5325	-0.0192608	0.5473	-0.0544372	0.627	-0.0252669	0.5521	-0.0217245	0.5496	-0.00448156	0.508	-0.00964422	0.5151	0.0174328	0.4692	-0.0394982	0.5674	-0.0237743	0.5556	-0.0140574	0.5383	-0.0389568	0.5828	0.0137643	0.4804	0.0788753	0.3339
hsa-miR-142-5p	0.0378249	0.4422	-0.00806472	0.512	0.444405	0.013	-0.0521899	0.5904	0.0217114	0.4609	0.342912	0.0483	0.16302	0.2673	0.0549233	0.4151	0.561924	0.0045	-0.055993	0.5782	0.206401	0.0959	0.256873	0.0766	0.0323086	0.4474	0.19807	0.1476	0.498544	0.021
hsa-miR-143-3p	0.00897081	0.4646	0.134969	0.318	0.558227	0.0011	-0.0250342	0.5366	0.278086	0.0351	0.662227	0.0001	-0.012768	0.5239	0.193037	0.1163	0.724306	0.0001	-0.0225013	0.5552	0.310981	0.0615	0.536037	0.0396	-0.0177357	0.5309	0.50625	0.0037	0.731745	0.0038
hsa-miR-144-3p	-0.00559543	0.5125	0.0439696	0.4609	0.00535427	0.4897	0.0101218	0.4881	0.035752	0.4437	0.0913725	0.4053	0.176183	0.4545	0.11691	0.3614	0.0573579	0.4472	0.0166944	0.433	0.0937011	0.3011	0.0371003	0.4422	0.394405	1	0.00973721	0.479	0.0627694	0.4399
hsa-miR-144-5p	0.00317682	0.4997	0.0204957	0.4727	0.0533617	0.3974	0.0307357	0.3727	0.0140781	0.4719	0.143707	0.2186	0.0117011	0.4587	-0.0354953	0.5395	0.138533	0.2419	-0.0205882	0.5529	-0.0103708	0.5286	0.052026	0.4355	-0.0278577	0.565	0.0476518	0.4052	0.229098	0.1
hsa-miR-1468-5p	-0.013062	0.5261	-0.0227741	0.5522	0.198128	0.0636	0.0184099	0.4412	-0.0286479	0.5413	0.266278	0.0647	0.0144769	0.458	-0.0138604	0.5283	0.229324	0.1159	0.0461954	0.4098	0.0824856	0.3024	0.32419	0.0166	-0.0105198	0.5179	0.0437527	0.4221	0.471368	0.0004
hsa-miR-146a-3p	0.054872	0.3448	0.0026851	0.4629	0.00147721	0.498	0.0462836	0.3485	-0.00508634	0.4975	0.0133947	0.482	0.073271	0.3302	-0.00228727	0.4735	-0.0175076	0.5373	0.0396004	0.3655	-0.0298453	0.5633	-0.00773414	0.5055	0.0412792	0.3817	-0.0255442	0.5534	0.00124555	0.4969
hsa-miR-146a-5p	0.109865	0.2557	0.244375	0.1213	0.435391	0.0447	0.12613	0.257	0.278808	0.0837	0.508395	0.0008	0.20671	0.1146	0.372604	0.0563	0.584381	0.0003	0.0784484	0.357	0.159973	0.2049	0.293746	0.0887	0.148197	0.2154	0.384106	0.0038	0.650244	0.0001
hsa-miR-146b-3p	-0.00712578	0.5112	0.150711	0.255	0.360787	0.0154	0.0172438	0.4706	0.220397	0.1453	0.455896	0.0036	0.0662352	0.3555	0.223919	0.1993	0.499307	0.0091	-0.0211512	0.5344	0.277447	0.0335	0.253779	0.1558	0.00638306	0.4942	0.371101	0.011	0.510742	0.0004
hsa-miR-146b-5p	-0.0331684	0.5535	0.453245	0.0314	0.628663	0.0004	-0.00289925	0.4981	0.453407	0.0343	0.693947	0.0002	0.023604	0.4513	0.517608	0.0294	0.76418	0	-0.0393066	0.5729	0.406889	0.0343	0.392344	0.0273	-0.0730273	0.5769	0.65572	0	0.724907	0
hsa-miR-147b	0.0660217	0.3213	0.336613	0.0176	0.372949	0.0179	0.00773387	0.4734	0.287483	0.0171	0.378847	0.0145	0.0514414	0.2981	0.33325	0.0175	0.404905	0.0092	0.030396	0.404	0.228704	0.0896	0.235974	0.1018	0.0408746	0.4362	0.332296	0.0241	0.312581	0.059
hsa-miR-148a-3p	-0.0139385	0.5201	0.00506469	0.4959	0.269408	0.2095	-0.0667322	0.5907	-0.0481957	0.5487	0.436671	0.0169	-0.0436102	0.5671	0.0318137	0.4628	0.492706	0.0428	0.0122723	0.4843	0.0160449	0.468	0.213833	0.2261	0.00368881	0.4913	0.175769	0.1493	0.47747	0.0078
hsa-miR-148a-5p	-0.0376026	0.593	-0.0421422	0.5744	0.0373072	0.3975	-0.024909	0.5334	-0.0432615	0.557	0.166361	0.2634	-0.0372096	0.6056	-0.0379878	0.5771	0.157168	0.1813	-0.0233476	0.5478	0.0135448	0.4462	0.0448991	0.4413	0.0463727	0.3577	-0.00291644	0.4939	0.398543	0.0108
hsa-miR-148b-3p	-0.0272031	0.5449	0.372732	0.086	0.590046	0.0007	0.00157388	0.4862	0.264936	0.0757	0.67861	0.0001	0.048704	0.3945	0.353557	0.048	0.757252	0	-0.0239836	0.5487	0.373824	0.0506	0.395067	0.0232	-0.0443532	0.5782	0.720177	0	0.73943	0.0002
hsa-miR-148b-5p	-0.036453	0.5594	-0.0631279	0.6041	0.0174833	0.4771	-0.0609856	0.5873	-0.0639799	0.5917	0.058189	0.3713	-0.026164	0.5519	-0.061844	0.5937	0.111615	0.3307	-0.0493664	0.6012	-0.0327513	0.5604	0.00530516	0.4908	-0.0436912	0.5753	-0.0510165	0.5931	0.142231	0.2544
hsa-miR-149-5p	-0.0177916	0.5403	0.243094	0.0676	0.417596	0.0184	0.0127114	0.4571	0.199936	0.092	0.588809	0.001	0.0430307	0.3889	0.109136	0.2123	0.536282	0.0041	-0.00255837	0.5002	0.2643	0.1176	0.357383	0.0188	-0.0098156	0.5236	0.387783	0.0163	0.519497	0.0005
hsa-miR-150-5p	-0.0261278	0.558	0.0185188	0.4593	0.00266865	0.5017	-0.00042991	0.5113	-0.0268775	0.5291	0.0461818	0.4426	-0.0263786	0.5582	-0.0228322	0.5248	0.0333407	0.4316	-0.0113354	0.5143	-0.0105148	0.5151	0.0965732	0.261	-0.0192329	0.5452	-0.0146909	0.5302	0.0940452	0.3066
hsa-miR-151a-3p	-0.00735011	0.516	0.0973912	0.3352	0.0526408	0.3921	-0.0489396	0.594	0.0370854	0.394	0.0196664	0.4406	-0.0356395	0.5966	0.0890708	0.3692	0.0647986	0.3416	-0.0280557	0.5583	0.134322	0.13	0.0782239	0.3497	-0.0139341	0.5266	0.225334	0.0539	0.227386	0.0592
hsa-miR-151a-5p	0.0102482	0.4934	-0.0304234	0.5397	0.36105	0.0392	-0.031223	0.5344	-0.0254099	0.5506	0.483479	0.0013	-0.00835326	0.513	-0.00897568	0.5149	0.420461	0.0084	-0.0222823	0.5317	0.0460436	0.4002	0.213369	0.1788	-0.0099745	0.5196	0.193976	0.1393	0.49818	0.0081
hsa-miR-152-3p	5.78107e-05	0.4954	0.0325432	0.4086	0.147791	0.1745	-0.0422222	0.5997	0.0432491	0.4089	0.201236	0.0956	0.031777	0.3654	-0.0231749	0.5333	0.270228	0.0603	-0.0263769	0.5571	0.0220906	0.3983	0.0974525	0.2717	-0.0293378	0.5638	0.15224	0.0819	0.281093	0.0205
hsa-miR-152-5p	-0.0405923	0.5655	0.019943	0.4739	-0.0389665	0.5709	-0.0195659	0.5279	0.181596	0.2016	0.0356851	0.4441	0.00883248	0.4764	0.161806	0.2899	0.200353	0.2613	-0.041819	0.5755	-0.0141165	0.5251	0.0518718	0.3833	0.00459203	0.4953	0.363084	0.014	-0.00782642	0.5101
hsa-miR-1537-3p	0.00113645	0.4963	-0.00315424	0.5024	0.101402	0.2415	0.00758557	0.4814	-0.0224678	0.5519	0.0473106	0.3776	0.00237928	0.4989	-0.0215844	0.5429	0.110701	0.2636	-0.013256	0.5246	-0.0122912	0.5283	0.0741127	0.2896	-0.000404362	0.4803	0.0332718	0.4251	0.205734	0.1128
hsa-miR-1538	0.0301217	0.3754	0.0545131	0.2932	0.160612	0.0893	-0.0226432	0.549	0.0446338	0.3208	0.158861	0.1224	-0.00559523	0.5125	0.10677	0.2158	0.265995	0.0188	-0.00422232	0.5005	0.164195	0.0885	0.128937	0.1527	0.0170398	0.4532	0.20039	0.0828	0.155686	0.0965
hsa-miR-155-3p	NA	1	0.449216	0.0249	NA	1	NA	1	0.524364	0.0014	NA	1	NA	1	0.575535	0.0013	NA	1	NA	1	0.340246	0.0725	NA	1	NA	1	0.638072	0.0003	NA	1
hsa-miR-155-5p	0.431585	0.0779	0.685492	0.0002	0.627119	0	0.619524	0.0079	0.694515	0.0001	0.572734	0.0004	0.657246	0.0367	0.709362	0	0.63042	0	0.532158	0.0045	0.487715	0.0284	0.42283	0.0221	0.638639	0.0035	0.659638	0	0.552043	0.0004
hsa-miR-15a-5p	-0.0152776	0.5251	0.15326	0.167	0.612714	0.0007	-0.0442822	0.6118	0.174452	0.1268	0.661909	0.0002	-0.042526	0.5829	0.210257	0.1161	0.719286	0	-0.0503121	0.5814	0.333723	0.0852	0.41429	0.0222	-0.064727	0.6105	0.527098	0.0025	0.73047	0.0003
hsa-miR-15b-3p	-0.01582	0.5359	0.0328512	0.4054	0.264646	0.0547	-0.0213081	0.5487	0.0191048	0.4448	0.466122	0.0017	-0.0297072	0.5662	-0.0145759	0.5265	0.467882	0.0095	-0.0404282	0.5672	0.113086	0.1799	0.195845	0.1467	-0.0161291	0.5411	0.206052	0.0615	0.581127	0.0006
hsa-miR-15b-5p	-0.0218355	0.5352	0.246302	0.0362	0.520313	0.0012	-0.0481647	0.5804	0.158079	0.3166	0.557621	0.0107	-0.0390456	0.5514	0.0480715	0.3914	0.595664	0.0004	-0.0420757	0.5788	0.224207	0.2006	0.341472	0.0746	0.0199387	0.4708	0.369834	0.0889	0.591147	0.0001
hsa-miR-16-2-3p	0.0123154	0.4686	0.189442	0.1228	0.510991	0.0012	-0.0334617	0.5772	0.092243	0.316	0.512326	0.0012	-0.00271895	0.5144	0.17724	0.2502	0.610469	0.0005	-0.016136	0.5415	0.315085	0.0291	0.263957	0.0895	-0.00748471	0.5201	0.597316	0.0001	0.624852	0.0008
hsa-miR-17-3p	0.0421528	0.4017	0.238096	0.1113	0.587852	0.0003	0.017516	0.4583	0.28306	0.0119	0.625076	0.0263	0.0306997	0.4225	0.243237	0.0286	0.694896	0	0.0264021	0.4039	0.275715	0.1256	0.381882	0.0254	0.00795394	0.4697	0.522529	0.0029	0.626831	0.0002
hsa-miR-17-5p	-0.0170073	0.5364	0.0473857	0.3831	0.294281	0.0257	-0.0226218	0.5257	0.15504	0.0829	0.419781	0.0075	0.0562057	0.3067	0.183564	0.1181	0.47822	0.0048	-0.0573755	0.6068	0.1239	0.2189	0.192192	0.2128	-0.0322441	0.5731	0.222476	0.0596	0.442202	0.0033
hsa-miR-181a-2-3p	0.10126	0.3236	0.363823	0.0141	0.686154	0.0001	0.00921802	0.4659	0.392601	0.0093	0.722018	0	0.0473155	0.4333	0.315978	0.0948	0.801171	0	-0.001562	0.5028	0.352373	0.0668	0.399932	0.0213	0.0816224	0.3898	0.685498	0	0.836795	0
hsa-miR-181a-3p	0.00666493	0.4934	0.211119	0.2132	0.629807	0.0008	-0.0433991	0.5548	0.124444	0.2921	0.609851	0.0022	0.0194754	0.4635	0.160952	0.2398	0.702362	0.0002	0.00328326	0.4825	0.237084	0.1482	0.380485	0.0424	0.0541128	0.4177	0.601271	0.0003	0.77159	0
hsa-miR-181b-3p	-0.0247483	0.5585	-0.0234688	0.5453	0.0266491	0.4331	-0.0448764	0.5888	-0.0184054	0.5508	0.10427	0.1964	-0.0492719	0.6073	0.0392176	0.3434	0.154505	0.1541	-0.0471686	0.5787	-0.0297976	0.5504	0.0857225	0.2799	-0.0227016	0.5457	0.0190128	0.4684	0.300424	0.0204
hsa-miR-181c-3p	-0.0279297	0.5554	0.0865102	0.3311	0.588904	0.0003	-0.0273499	0.5611	-0.0123058	0.5222	0.674828	0.0002	0.0442336	0.3977	0.0689968	0.3785	0.726119	0.0001	-0.0166681	0.5272	0.219631	0.1947	0.395418	0.0395	-0.0396949	0.573	0.519926	0.002	0.718685	0
hsa-miR-181c-5p	0.00255926	0.4762	0.40316	0.0143	0.424134	0.0108	-0.00425665	0.4941	0.337557	0.0541	0.434799	0.0874	-0.0427252	0.56	0.411503	0.0064	0.436768	0.0549	-0.046884	0.5792	0.290707	0.0637	0.197448	0.2335	-0.0120903	0.5264	0.580156	0.0006	0.430034	0.0264
hsa-miR-181d-5p	-0.0197989	0.5486	0.0835279	0.3002	0.104825	0.2657	0.0323946	0.3894	0.265555	0.0273	0.157851	0.1354	0.0259077	0.426	0.259619	0.0385	0.108524	0.283	-0.0114385	0.5172	0.133327	0.1855	0.014711	0.4569	0.0102524	0.4608	0.250892	0.0394	0.0771463	0.3324
hsa-miR-182-5p	-0.0436969	0.6403	0.258948	0.0421	0.391673	0.0089	0.0452763	0.4183	0.184933	0.121	0.550018	0.0015	-0.027474	0.5542	0.267402	0.0351	0.646668	0.0002	-0.0342531	0.588	0.264472	0.1004	0.268959	0.1198	-0.0363193	0.5496	0.515294	0.0008	0.5551	0.0051
hsa-miR-183-5p	-0.0259297	0.5547	-0.0168592	0.5424	0.0207761	0.4378	0.0114673	0.4699	-0.0271657	0.565	0.169742	0.153	0.00369857	0.4765	0.0169835	0.4693	0.20581	0.0537	-0.0240325	0.5582	0.0358736	0.3932	-0.00374877	0.5014	-0.0178182	0.5399	0.0367536	0.4421	0.212103	0.1076
hsa-miR-185-3p	-0.00132994	0.502	0.108351	0.2472	0.107702	0.276	-0.01518	0.527	0.0470577	0.3607	0.161172	0.0994	0.00866136	0.495	0.136895	0.1025	0.214145	0.0526	-0.0324345	0.5706	0.136302	0.1554	0.157747	0.0901	-0.0376852	0.5865	0.152837	0.2061	0.157008	0.1437
hsa-miR-185-5p	-0.0151753	0.525	0.0311355	0.4538	0.365297	0.007	0.0749184	0.2668	0.113934	0.2439	0.449831	0.0047	-0.0228666	0.5511	0.0934637	0.2793	0.549713	0.0003	0.0420033	0.3869	0.313086	0.0096	0.231674	0.0685	-0.00540296	0.5189	0.389237	0.0113	0.508179	0.0009
hsa-miR-186-5p	0.00423658	0.4905	0.720363	0.0001	0.812065	0.0002	-0.0270971	0.5491	0.585408	0.0031	0.872299	0	-0.0482138	0.5799	0.702492	0.0002	0.900821	0	-0.0201622	0.5443	0.552659	0.0044	0.6474	0.0061	-0.0428881	0.5651	0.862512	0	0.852954	0
hsa-miR-188-5p	0.034445	0.4551	0.0294044	0.4498	0.0235844	0.4103	-0.0134644	0.5272	-0.0326707	0.56	0.0526753	0.3212	0.0337558	0.4408	-0.0179771	0.5274	0.120486	0.2675	0.0494859	0.3391	0.0448066	0.3771	0.0444132	0.3941	0.0337152	0.4141	0.0164788	0.4673	0.0286627	0.4217
hsa-miR-18a-3p	-0.0191407	0.5403	0.130409	0.1762	0.353167	0.0113	0.0363034	0.3708	0.0859437	0.2601	0.416611	0.0066	-0.00979535	0.5201	0.182848	0.1114	0.516837	0.0006	-0.0274886	0.5589	0.212215	0.1856	0.192926	0.1195	-0.0334903	0.5761	0.510481	0.0001	0.502323	0.0009
hsa-miR-18a-5p	0.0845645	0.2402	-0.00935652	0.5246	0.235465	0.104	-0.0197604	0.5372	0.0218646	0.4705	0.411622	0.0033	0.0473234	0.3909	0.0329671	0.4033	0.375919	0.0121	0.0399769	0.3871	-0.00759658	0.5093	0.172916	0.1888	0.0331159	0.405	0.0344358	0.3928	0.375159	0.0094
hsa-miR-1908-3p	-0.0284295	0.5663	0.0640125	0.3123	0.0627752	0.3694	-0.0150444	0.5409	0.0324774	0.4152	0.0987627	0.2452	-0.0199021	0.549	-0.00712166	0.5098	0.124293	0.2166	-0.0317485	0.5842	0.0975128	0.2204	0.0648692	0.3341	-0.0215065	0.5584	0.0727244	0.324	0.097143	0.2303
hsa-miR-1908-5p	0.0466204	0.3816	0.297513	0.0172	0.582967	0.0026	-0.0325187	0.5639	0.262893	0.0219	0.672555	0.0003	0.0043987	0.4964	0.23218	0.0829	0.735048	0	-0.03479	0.5741	0.378695	0.0269	0.411555	0.026	0.0236395	0.4291	0.635027	0	0.772264	0
hsa-miR-190a-5p	-0.034648	0.5626	0.190236	0.1512	0.377118	0.0115	-0.0153221	0.5389	0.104953	0.3106	0.596368	0.0002	-0.0355588	0.5941	0.251505	0.0697	0.712013	0	-0.0272399	0.5552	0.0936262	0.304	0.334679	0.0801	-0.00693379	0.5097	0.313314	0.0433	0.700789	0
hsa-miR-190b	0.0100611	0.4718	-0.0294272	0.5626	-0.0146104	0.5375	-0.0246564	0.5325	-0.0203288	0.5463	0.0237347	0.4313	-0.0380811	0.5672	-0.0100607	0.5082	0.0532947	0.3734	-0.0215043	0.5403	-0.0178256	0.5487	-0.0145807	0.5327	0.0814481	0.3765	-0.0310264	0.5619	0.0519092	0.3315
hsa-miR-191-3p	-0.0388007	0.5945	0.593872	0.0005	0.629351	0.0002	-0.0317692	0.5915	0.56628	0.0002	0.705334	0	-0.0382011	0.5963	0.585873	0.0015	0.731104	0	-0.0403925	0.6006	0.480687	0.0029	0.495235	0.0057	0.0563595	0.3672	0.713683	0	0.711056	0
hsa-miR-191-5p	-0.0511632	0.5972	-0.0299949	0.5518	0.0161453	0.487	-0.0523272	0.5715	-0.0299402	0.5662	0.120895	0.2916	-0.0416042	0.6103	-0.0494098	0.5787	0.30951	0.0461	-0.035876	0.5851	-0.0110062	0.5269	0.0556538	0.4159	-0.0464162	0.6125	0.0317967	0.4682	0.158907	0.3383
hsa-miR-192-5p	0.0264119	0.452	0.0161599	0.4555	0.282859	0.0947	-0.0394704	0.5905	-0.00975065	0.5164	0.329065	0.0396	-0.0538082	0.6085	-0.0143413	0.5213	0.548201	0.0001	-0.0363511	0.5626	0.00645618	0.4911	0.165015	0.2691	-0.038024	0.5766	0.152501	0.1453	0.519195	0.0074
hsa-miR-193a-3p	0.062982	0.3233	-0.0349681	0.5808	0.24361	0.1103	0.019045	0.4392	-0.0266882	0.5415	0.159749	0.3438	0.0168697	0.4833	-0.0292655	0.5438	0.374079	0.0158	-0.00877384	0.5149	0.0587704	0.3459	0.21562	0.1421	-0.00521154	0.4953	0.0965132	0.3306	0.185573	0.2176
hsa-miR-193a-5p	-0.0192381	0.5407	0.0979463	0.3279	0.334075	0.0214	-0.0109267	0.5305	0.100192	0.3037	0.494924	0.0019	-0.026911	0.5663	0.120341	0.2496	0.582801	0.0001	-0.0411792	0.5868	0.169928	0.2011	0.272132	0.0472	-0.0234256	0.5474	0.395701	0.0046	0.586017	0.0003
hsa-miR-193b-3p	-0.0483135	0.601	0.118638	0.265	0.326963	0.0233	-0.0105057	0.5278	0.299771	0.0718	0.475876	0.0012	-0.0259391	0.5468	0.320542	0.0264	0.52546	0.0002	-0.0453424	0.6105	0.113206	0.2585	0.204379	0.1232	-0.0365958	0.57	0.430713	0.0013	0.521027	0.0003
hsa-miR-196b-5p	0.0218141	0.4393	-0.0107004	0.5171	-0.0107615	0.5244	-0.0151189	0.5314	-0.0166236	0.5282	-0.00879829	0.5143	-0.0139441	0.5282	0.015766	0.4707	-0.00940541	0.5205	-0.0121456	0.5264	-0.0134877	0.5322	-0.0196865	0.554	-0.035032	0.5598	-0.0236432	0.5531	-0.0126858	0.5345
hsa-miR-197-3p	-0.00847516	0.504	0.580543	0.002	0.730946	0	-0.047819	0.5989	0.523924	0.0038	0.808519	0	-0.0224206	0.5561	0.554899	0.0003	0.862704	0	-0.0441907	0.6323	0.485057	0.0175	0.55468	0.017	-0.0628513	0.67	0.773372	0	0.839687	0
hsa-miR-1976	-0.0181658	0.5475	-0.016045	0.5462	0.131561	0.1823	0.0137392	0.4635	0.0265921	0.3778	0.203184	0.062	-0.00226998	0.5078	0.00233559	0.4801	0.31321	0.0101	-0.00299579	0.503	0.0758197	0.2534	0.157909	0.1161	0.00604622	0.4689	0.131599	0.1649	0.408684	0.0009
hsa-miR-199b-3p	0.0950426	0.2365	0.00373096	0.4947	0.0623742	0.3832	-0.0117756	0.5271	-0.0275731	0.5541	0.0642874	0.3344	-0.0322712	0.5803	-0.0212903	0.5447	0.0991398	0.3244	0.0191175	0.4667	0.00151714	0.492	0.0365625	0.4265	0.0739435	0.3813	0.0247843	0.3993	0.114244	0.2214
hsa-miR-199b-5p	0.046083	0.3995	0.188079	0.2003	0.584708	0.0016	-0.00928669	0.5121	0.138782	0.1698	0.703576	0	0.00448123	0.4878	0.179075	0.1211	0.729066	0.0001	0.00405403	0.4829	0.319591	0.0469	0.387556	0.0484	0.00767384	0.4879	0.671593	0	0.714281	0
hsa-miR-19a-3p	-0.0351988	0.5953	-0.0481722	0.5669	0.0248602	0.4624	-0.0100623	0.527	-0.0431192	0.5693	0.192787	0.0869	-0.0358785	0.5629	0.00190977	0.4771	0.048439	0.4341	-0.047414	0.5955	-0.0501191	0.6062	0.0606558	0.3914	-0.00797652	0.5149	-0.0298067	0.5528	0.0447537	0.3733
hsa-miR-19a-5p	-0.0468692	0.578	-0.00118181	0.5005	0.0146227	0.4795	-0.0369177	0.5583	-0.00152988	0.4992	0.0527944	0.3903	-0.0362293	0.5737	0.0236302	0.4373	0.0844632	0.3491	-0.0345265	0.5724	-0.0190195	0.5337	0.035078	0.4216	-0.0425717	0.5918	0.0775558	0.3654	0.0485244	0.4108
hsa-miR-200a-3p	0.056038	0.3423	-0.030355	0.5732	0.0227384	0.4748	-0.0257113	0.5549	-0.0083521	0.5067	0.143602	0.2029	-0.0192148	0.5383	-0.0376364	0.5679	0.061466	0.3862	-0.0137592	0.5203	0.0422312	0.4018	0.0951767	0.3681	0.0441818	0.3554	0.0361977	0.3972	0.222098	0.1208
hsa-miR-200b-3p	0.014852	0.4316	-0.00516053	0.4961	0.132158	0.1457	0.00632088	0.4591	-0.00592327	0.5057	0.119919	0.1465	-0.0256464	0.5613	0.0124864	0.4533	0.116069	0.1924	-0.0385359	0.6216	-0.0296171	0.5709	0.187998	0.1128	-0.000850939	0.4895	-0.0225367	0.5426	0.146835	0.1982
hsa-miR-200c-3p	0.00547212	0.4871	0.00123806	0.4748	0.0678389	0.2694	-0.0289991	0.5465	0.0167328	0.4194	0.0379001	0.3974	-0.0282339	0.554	-0.014585	0.5299	0.0468899	0.3677	-0.0028573	0.4947	-0.00598456	0.5155	0.00610482	0.4714	0.00292188	0.4998	0.0312415	0.4407	0.140908	0.1857
hsa-miR-203a	0.0475126	0.3826	-0.00731322	0.515	0.0269211	0.4231	0.0893077	0.2434	0.0390482	0.4154	0.0732143	0.2458	0.0562191	0.3486	0.0666342	0.3209	0.129082	0.1603	0.0195823	0.4594	0.0436764	0.4239	0.0350954	0.4133	0.0646301	0.368	0.0697602	0.2933	0.164641	0.1677
hsa-miR-208b-3p	NA	1	0.415711	0.0084	0.513904	0.0088	NA	1	0.372911	0.1439	0.426315	0.0228	NA	1	0.403794	0.0361	0.623536	0.0005	NA	1	0.576452	0.0029	0.517534	0.013	NA	1	0.628492	0.0127	0.602153	0.0003
hsa-miR-20a-5p	-0.0455948	0.6022	0.145094	0.2316	0.202715	0.1295	-0.0314534	0.576	0.0109061	0.4775	0.372852	0.0165	0.0153052	0.4409	0.0581811	0.3932	0.436256	0.0149	-0.0367482	0.5867	0.227082	0.0441	0.197192	0.1542	-0.0482122	0.6212	0.310849	0.0438	0.414579	0.0096
hsa-miR-20b-5p	-0.00425033	0.5097	0.0481145	0.3641	-0.0057822	0.5158	0.0419873	0.3855	0.00124854	0.4869	0.0643675	0.3092	-0.0273131	0.5517	0.0296117	0.4224	0.101856	0.2512	-0.0298027	0.5536	-0.00494445	0.5134	0.00594392	0.4842	0.0634589	0.359	0.0812709	0.2626	0.0976794	0.2362
hsa-miR-21-3p	-0.00542447	0.5045	-0.0294681	0.5337	0.232083	0.0894	-0.0427768	0.5489	0.118649	0.182	0.340408	0.0167	-0.0662542	0.6117	-0.0264657	0.5411	0.377453	0.0437	-0.0489134	0.5985	0.0179466	0.4649	0.149742	0.2656	0.0665377	0.3954	0.0911676	0.3172	0.42121	0.0288
hsa-miR-21-5p	-0.00906443	0.5201	0.0774554	0.3657	0.516343	0.006	-0.0269959	0.5454	0.074684	0.3703	0.711152	0.0002	0.0813282	0.366	0.215643	0.0814	0.777306	0.0001	-0.0568657	0.5998	0.242687	0.1396	0.378942	0.0475	-0.0422766	0.582	0.57974	0.0014	0.769441	0.0004
hsa-miR-210-3p	-0.0193355	0.542	0.0693954	0.3656	0.310868	0.0449	0.0398262	0.4182	0.158784	0.1077	0.518577	0.0007	-0.00633406	0.5191	0.0788862	0.3388	0.601312	0.0006	0.00197737	0.4945	0.309066	0.0146	0.392006	0.0113	-0.0262863	0.5542	0.364906	0.0106	0.603718	0
hsa-miR-210-5p	-0.000998318	0.502	0.117155	0.2313	0.198941	0.2356	0.0163638	0.4771	0.142031	0.2336	0.200973	0.1888	0.0476868	0.4525	0.0491568	0.3889	0.244587	0.1678	-0.00635349	0.5145	0.161444	0.1856	0.11571	0.2855	0.0361996	0.4334	0.278758	0.0382	0.316865	0.0219
hsa-miR-2110	0.0176597	0.4421	-0.0292968	0.5775	0.0897081	0.3161	-0.0155859	0.5418	0.0553403	0.3454	0.157239	0.1378	-0.000118025	0.4913	0.0899932	0.2052	0.16718	0.1625	-0.0260101	0.5672	0.0700134	0.2841	0.155509	0.1122	-0.00474178	0.5079	0.0956256	0.2896	0.328406	0.0123
hsa-miR-2116-3p	-0.00738332	0.5165	0.146935	0.1235	0.377649	0.0024	-0.0200574	0.5592	0.150287	0.1158	0.467145	0.0005	-0.00652308	0.5187	0.126998	0.1389	0.563855	0	0.0199281	0.4132	0.22699	0.074	0.310558	0.0224	-0.0157733	0.546	0.484264	0.0004	0.529503	0.0003
hsa-miR-2116-5p	0.00831578	0.4794	0.02849	0.3898	0.0488544	0.3161	0.00324107	0.4645	-0.0114653	0.5237	0.0610921	0.2817	0.0299944	0.403	0.0393753	0.4001	0.0633137	0.3586	-0.0170099	0.5313	0.0168109	0.4593	0.00507923	0.4736	0.00894758	0.452	0.0627688	0.344	0.106533	0.1463
hsa-miR-212-3p	0.232464	0.1347	0.149268	0.2911	0.327148	0.0174	0.449251	0.0071	0.146586	0.1981	0.330641	0.0572	0.389419	0.0234	0.209941	0.1921	0.381424	0.0137	0.0672962	0.4068	0.236001	0.1414	0.119387	0.3138	0.0530751	0.338	0.415078	0.016	0.419293	0.0193
hsa-miR-212-5p	0.0332656	0.4102	-0.00216428	0.4962	0.0856603	0.338	0.0490014	0.4286	-0.00120113	0.5052	0.211049	0.0645	0.0149234	0.4457	0.028113	0.4597	0.232453	0.0691	-0.00360222	0.4947	-0.0123851	0.5216	0.162127	0.1934	-0.0311802	0.5841	0.120719	0.3636	0.31994	0.0339
hsa-miR-215-5p	-0.0382521	0.5792	0.0921322	0.3218	-0.0168532	0.5299	-0.0234318	0.547	0.0526706	0.2991	0.0226273	0.4315	-0.0387221	0.5819	-0.0427725	0.5794	-0.0329895	0.5746	0.0323881	0.4074	-0.020441	0.5323	-0.0312433	0.5526	-0.0271325	0.5484	-0.0482039	0.5692	-0.00133853	0.4962
hsa-miR-22-3p	-0.0570186	0.6184	0.0465501	0.4198	0.493343	0.0205	-0.0774482	0.6171	0.0517289	0.3894	0.576969	0.0008	-0.0535229	0.6168	0.025526	0.4753	0.600205	0.0025	-0.0491344	0.6037	0.267298	0.1093	0.263389	0.1036	-0.0675694	0.5903	0.432213	0.0093	0.658837	0.0002
hsa-miR-22-5p	-0.0293133	0.533	-0.00154299	0.5024	0.364536	0.0128	-0.0176785	0.5302	0.00791077	0.4767	0.483154	0.0022	-0.0340501	0.5842	-0.0141566	0.5181	0.564008	0.0145	-0.00977831	0.5168	0.0979233	0.3105	0.224965	0.086	-0.0102354	0.5196	0.283704	0.1275	0.625735	0.0002
hsa-miR-221-3p	0.0779698	0.3986	0.609636	0.0008	0.664096	0.0006	0.267548	0.0695	0.512145	0.0048	0.737439	0.0006	0.251508	0.0673	0.583961	0.0006	0.738589	0.0022	0.0377937	0.4421	0.501442	0.0095	0.403899	0.0147	0.0887381	0.2741	0.767171	0	0.728175	0.0004
hsa-miR-221-5p	0.16378	0.2882	0.123627	0.2148	0.354551	0.0632	0.205022	0.1756	0.0901526	0.2777	0.563759	0.0062	0.27872	0.1163	0.134039	0.2209	0.587462	0.0002	0.0328143	0.4065	0.121576	0.1975	0.230732	0.071	0.312777	0.0322	0.288312	0.1551	0.595911	0.0003
hsa-miR-222-3p	0.202988	0.2676	0.388979	0.0517	0.585024	0.0009	0.3998	0.0414	0.401787	0.0426	0.697856	0.0001	0.29463	0.0657	0.35213	0.0948	0.756708	0.0002	0.124076	0.3392	0.443177	0.0289	0.377873	0.0228	0.11909	0.3412	0.699806	0	0.784725	0.0002
hsa-miR-222-5p	-0.0197759	0.5487	0.410595	0.0053	0.29778	0.0594	-0.00576574	0.5071	0.4479	0.0166	0.318753	0.0181	0.0725484	0.3559	0.330804	0.0494	0.315746	0.0201	-0.0393293	0.5578	0.452404	0.0317	0.0297044	0.4597	0.0169704	0.4647	0.674541	0	0.230391	0.1161
hsa-miR-223-3p	-0.00580561	0.5071	0.473631	0.0071	0.43221	0.0254	0.00492489	0.4939	0.325908	0.0369	0.533709	0.0115	0.0264444	0.4508	0.584104	0.0001	0.547775	0.0032	-0.00375792	0.4997	0.499114	0.0035	0.343198	0.0143	-0.00300388	0.5039	0.458398	0.0256	0.542883	0.0008
hsa-miR-223-5p	-0.00399619	0.4995	-0.0259747	0.57	0.154634	0.2602	-0.0301328	0.5641	-0.0254646	0.5524	0.367322	0.0307	-0.00853538	0.5177	0.00365717	0.4907	0.490597	0.0022	0.0338927	0.3675	0.0116589	0.4725	0.263372	0.1091	0.00665511	0.4825	0.018102	0.4548	0.449434	0.0164
hsa-miR-2277-5p	-0.00611387	0.5119	0.05953	0.336	0.284824	0.0321	0.0276742	0.4432	0.0883251	0.2798	0.429033	0.0011	-0.0257828	0.5625	0.0547141	0.3282	0.455983	0.0011	0.0737411	0.3289	0.222893	0.1106	0.328743	0.0207	-0.00849017	0.5145	0.305548	0.0183	0.417591	0.0038
hsa-miR-2355-3p	-0.0110639	0.5268	0.012666	0.4516	0.00345095	0.4803	0.00407847	0.4755	0.00981788	0.458	0.0290214	0.4117	0.00260792	0.4945	-0.0205021	0.5523	0.0584384	0.2651	0.00137698	0.4877	-0.0122966	0.5357	-0.00353224	0.509	0.0208598	0.4047	-0.0122327	0.5246	0.0437514	0.3217
hsa-miR-2355-5p	-0.0296729	0.5914	0.0142395	0.4456	0.0597418	0.3251	-0.0185161	0.5415	0.139734	0.1256	0.1932	0.0732	-6.56345e-05	0.4982	0.0454773	0.3808	0.19804	0.1055	-0.0131199	0.5247	-0.0202542	0.558	0.0710957	0.3044	-0.0144779	0.5307	0.0651901	0.2945	0.270214	0.0258
hsa-miR-23a-3p	0.144621	0.2606	0.485201	0.0145	0.702406	0.0008	0.267375	0.0465	0.394465	0.0133	0.761255	0	0.0330652	0.4559	0.444341	0.0254	0.818241	0	-0.00423044	0.5097	0.417528	0.0192	0.458016	0.0112	-0.0102758	0.5198	0.718157	0	0.817403	0
hsa-miR-23a-5p	-0.0474299	0.5897	0.0071464	0.4911	0.103571	0.2456	-0.00604292	0.5057	-0.0254277	0.5382	0.205836	0.1339	-0.0274943	0.5592	-0.0198145	0.533	0.256473	0.0974	-0.0372365	0.5748	0.0606338	0.3124	0.113443	0.2818	-0.0179683	0.5354	0.183727	0.0873	0.229796	0.1421
hsa-miR-23b-3p	-0.0122123	0.5262	0.628826	0.0003	0.619423	0.0003	0.00707417	0.4969	0.556014	0.001	0.654141	0.0003	-0.00775263	0.5177	0.595458	0	0.791495	0.0005	-0.0156623	0.5239	0.40933	0.0287	0.336729	0.043	-0.0412035	0.5717	0.677627	0	0.793278	0.0036
hsa-miR-24-2-5p	0.00204028	0.4877	-0.0201633	0.5382	0.195543	0.1103	0.0117507	0.4748	0.0301823	0.4342	0.261315	0.0558	0.0959713	0.2311	0.0181321	0.4672	0.367814	0.0339	-0.0108713	0.5208	0.0511432	0.3597	0.138164	0.2303	0.0108383	0.4783	0.156274	0.1972	0.429591	0.0088
hsa-miR-2467-5p	-0.0132687	0.5256	0.490712	0.0034	0.538372	0.0025	-0.029467	0.5715	0.526699	0.0069	0.702961	0.0002	0.112406	0.1895	0.574553	0.0009	0.682524	0	0.0510994	0.4129	0.573938	0.0029	0.438926	0.0532	0.0360359	0.4424	0.672047	0.0001	0.681015	0
hsa-miR-25-3p	-0.0457061	0.5791	-0.0281421	0.5684	0.113723	0.285	0.0117995	0.4857	-0.0137769	0.5201	0.231733	0.1359	-0.0391039	0.5719	-0.0623624	0.6092	0.318678	0.2058	-0.0240516	0.5491	0.0320233	0.4236	0.159742	0.2336	-0.0121576	0.5192	0.121255	0.2583	0.359341	0.0327
hsa-miR-25-5p	0.000290748	0.4773	0.0572714	0.3644	0.118999	0.1679	-0.0300092	0.563	0.139605	0.1358	0.30949	0.0533	0.0199488	0.4583	0.134698	0.1801	0.43665	0.0444	0.202324	0.0628	0.158955	0.1709	0.025183	0.464	0.0348257	0.4118	0.352099	0.009	0.437581	0.0026
hsa-miR-26a-2-3p	-0.0159864	0.5264	0.264977	0.1438	0.43063	0.0134	-0.0298935	0.5704	0.151495	0.3258	0.637151	0.0009	-0.0144857	0.5331	0.334611	0.0382	0.731228	0	-0.0315809	0.5649	0.200339	0.1567	0.338735	0.0735	0.0152482	0.4554	0.579358	0.0002	0.657531	0
hsa-miR-26b-3p	0.103993	0.2492	0.629729	0.001	0.734876	0	0.0207072	0.44	0.553615	0.0012	0.787878	0	0.0634716	0.3808	0.684324	0	0.810517	0	0.0826168	0.2637	0.508703	0.01	0.605927	0.0093	0.00989815	0.476	0.793308	0	0.81029	0
hsa-miR-26b-5p	-0.0488499	0.6053	0.0367949	0.4134	0.384284	0.0079	-0.0460262	0.5493	0.015159	0.4751	0.522509	0.0008	-0.0226579	0.5455	0.106009	0.3446	0.595284	0.0012	-0.0556292	0.6171	0.125134	0.2296	0.251796	0.1702	-0.0277053	0.5481	0.388698	0.0038	0.548907	0.023
hsa-miR-27a-3p	-0.0119582	0.5253	0.729031	0.0002	0.755653	0	-0.0443943	0.6122	0.678223	0.0005	0.761844	0	0.0481588	0.4092	0.696101	0.0001	0.772285	0	-0.041891	0.5977	0.658165	0.0645	0.607038	0.0336	-0.00656587	0.5075	0.843966	0	0.762096	0
hsa-miR-27a-5p	-0.0403335	0.5719	0.015945	0.479	-0.0316967	0.5354	-0.0439886	0.5432	0.0753814	0.395	-0.0410309	0.5632	-0.0312124	0.564	0.102069	0.3908	-0.0276284	0.5531	0.0107843	0.4899	0.00676016	0.4916	-0.0536403	0.5923	-0.0292927	0.5614	-0.0183655	0.5264	-0.0323267	0.5386
hsa-miR-27b-3p	-0.00749789	0.5121	0.790167	0.0002	0.7425	0.0024	-0.0452213	0.5928	0.68849	0.0005	0.806105	0	-0.0279908	0.5497	0.746237	0	0.826155	0	-0.0438514	0.5802	0.654212	0.0144	0.565226	0.0668	-0.0544744	0.5889	0.897496	0	0.815558	0
hsa-miR-27b-5p	-0.0307733	0.5832	-0.0422897	0.5841	0.0826761	0.3145	0.0669291	0.3301	-0.0163806	0.5314	0.100556	0.298	0.00730255	0.4863	-0.0286622	0.5518	0.0437316	0.3958	-0.0108822	0.5212	-0.0148977	0.5185	0.0642772	0.3664	-0.03918	0.5677	0.10194	0.1961	0.175839	0.0469
hsa-miR-28-3p	-0.0236814	0.5537	-0.0370168	0.557	0.216898	0.1156	-0.0458148	0.576	-0.00889986	0.5204	0.310103	0.0148	-0.0422259	0.5911	-0.0345038	0.5746	0.305002	0.07	-0.0360411	0.5562	0.122629	0.2087	0.109713	0.4012	-0.0149793	0.5286	0.17448	0.1827	0.384746	0.0242
hsa-miR-28-5p	-0.0143272	0.5317	0.0389266	0.4343	0.360032	0.0158	0.00700451	0.4814	0.087595	0.3947	0.337825	0.0159	-0.00553721	0.5051	0.120393	0.28	0.361297	0.0386	0.049796	0.4331	0.0654411	0.333	0.143622	0.2169	-0.00556306	0.5078	0.104438	0.2912	0.347462	0.0125
hsa-miR-29a-3p	-0.0163511	0.5335	-0.0254385	0.5468	0.451397	0.0076	-0.0270571	0.554	0.103223	0.3037	0.532381	0.0007	0.0221761	0.4474	0.177763	0.2944	0.579239	0.0021	-0.0358017	0.5987	0.0731514	0.3116	0.271757	0.0896	-0.0432883	0.5914	0.263741	0.0497	0.638855	0.001
hsa-miR-29a-5p	-0.0100888	0.5194	-0.003005	0.4931	-0.00271573	0.505	-0.0215634	0.5581	0.00367429	0.4695	0.096928	0.1805	0.0533364	0.3526	-0.0171729	0.5409	0.00956	0.4657	-0.0281775	0.5666	0.059018	0.3259	-0.020895	0.5539	-0.0172977	0.5393	-0.00931526	0.5155	0.227702	0.0361
hsa-miR-29b-1-5p	-0.00397759	0.5102	0.029357	0.3774	0.0125836	0.4753	-0.00502212	0.5023	0.0753104	0.3877	0.104423	0.1973	0.00495783	0.4814	0.0271073	0.4312	0.0829283	0.2599	-0.0120412	0.5245	0.0521411	0.3286	0.048408	0.3681	0.0472609	0.3969	0.213188	0.0599	0.110419	0.2451
hsa-miR-29c-3p	-0.00278849	0.4944	0.038049	0.3856	0.28304	0.0523	-0.00552174	0.5043	-0.0086841	0.5143	0.449327	0.0089	-0.0134264	0.5262	0.0741806	0.3656	0.48728	0.0025	0.00705432	0.4847	0.210792	0.1525	0.269444	0.1127	-0.0248771	0.5371	0.348823	0.0069	0.57733	0.0012
hsa-miR-29c-5p	-0.00527358	0.5131	-0.0206569	0.5426	0.0841442	0.2322	-0.0115899	0.5271	0.0119956	0.4379	0.156644	0.1646	0.0209365	0.414	-0.00327284	0.502	0.142482	0.1329	0.00917441	0.4819	0.0684701	0.3041	0.0812101	0.3314	-0.0116892	0.5303	0.0173975	0.413	0.180536	0.0638
hsa-miR-301a-3p	0.00969067	0.4702	-0.011507	0.5249	0.256402	0.0323	-0.0482215	0.6269	0.0200189	0.4592	0.310821	0.033	-0.0202064	0.5377	0.0615183	0.4129	0.467571	0.0116	-0.0259733	0.5491	0.0839296	0.3944	0.0914751	0.3926	-0.0446685	0.5702	0.330325	0.0339	0.52699	0.0029
hsa-miR-301b	0.0349946	0.4299	-0.0185961	0.5332	0.197045	0.2139	-0.0401048	0.5919	-0.0257472	0.5252	0.41858	0.0023	-0.0169227	0.5329	-0.0012643	0.494	0.315152	0.0602	-0.0379157	0.5661	0.0760327	0.4075	0.181325	0.2494	0.0228594	0.4285	0.288201	0.024	0.57302	0.0037
hsa-miR-3065-3p	-0.0255573	0.5669	0.0302522	0.4487	0.131861	0.3004	-0.0199677	0.5521	0.172316	0.2268	0.238839	0.1003	0.00207943	0.4901	0.110376	0.3257	0.253272	0.0455	-0.0302781	0.5755	0.0587802	0.3909	0.205753	0.0952	-0.0373455	0.5677	0.162884	0.1271	0.2755	0.0742
hsa-miR-30a-5p	-0.0197394	0.5376	-0.0463749	0.5952	0.345402	0.0187	0.0280334	0.4555	-0.0245646	0.5575	0.437967	0.0037	-0.00332213	0.5071	0.000905292	0.4934	0.559694	0.0001	0.038524	0.4416	-0.0299714	0.5681	0.100758	0.4007	-0.0045726	0.4908	-0.0141775	0.511	0.468797	0.0027
hsa-miR-30b-3p	0.0839429	0.3637	0.103322	0.1806	0.321346	0.0095	-0.00322136	0.5095	0.0660911	0.3645	0.290818	0.0713	0.0734075	0.2748	0.122323	0.1956	0.37693	0.0362	0.037472	0.358	0.195286	0.1715	0.262663	0.1236	0.0435945	0.3423	0.437519	0.0031	0.304281	0.0348
hsa-miR-30b-5p	-0.0282707	0.5594	3.4644e-05	0.4995	0.0391727	0.451	-0.0520583	0.5674	-0.0409867	0.563	0.0732643	0.3397	-0.041043	0.5905	-0.0435323	0.6002	0.133866	0.2466	-0.0275475	0.5698	-0.0275012	0.5606	0.0667459	0.323	-0.0471585	0.5779	0.0523523	0.324	0.162281	0.1887
hsa-miR-30c-1-3p	-0.0197985	0.5369	0.298716	0.0334	0.481022	0.0006	0.0765966	0.3703	0.19761	0.1612	0.600166	0.0002	0.130527	0.1729	0.283223	0.1901	0.645253	0	0.0802743	0.2981	0.313243	0.0443	0.323498	0.0337	-0.0309064	0.5512	0.63287	0	0.548734	0.0022
hsa-miR-30d-5p	-0.0404568	0.5721	0.153178	0.2213	0.258604	0.0692	-0.0293211	0.543	0.0417852	0.4138	0.359753	0.0153	0.0202108	0.4771	0.104759	0.3221	0.586701	0.0001	-0.0154646	0.5338	0.184207	0.0912	0.124675	0.3571	-0.0459824	0.5979	0.373253	0.0028	0.479586	0.0071
hsa-miR-30e-3p	0.0190618	0.4588	0.0327145	0.4614	0.575346	0.0185	0.00688772	0.5029	0.0402551	0.4192	0.607217	0.0046	0.20986	0.1293	0.160687	0.2069	0.704179	0	-0.0403221	0.5742	0.180343	0.1696	0.445139	0.0178	-0.0308712	0.552	0.520389	0.0087	0.731082	0
hsa-miR-30e-5p	-0.0355694	0.5977	0.0918632	0.2888	0.289211	0.0513	-0.0454887	0.5734	0.104741	0.2462	0.319318	0.0179	-0.0325074	0.5633	0.0738749	0.2887	0.418787	0.0175	-0.0174849	0.5376	0.170014	0.1595	0.181755	0.1815	-0.0496236	0.5952	0.321575	0.0143	0.406436	0.0018
hsa-miR-3174	-0.0251267	0.5798	0.252097	0.0775	0.308993	0.0116	-0.0155041	0.5471	0.345933	0.0196	0.442661	0.0006	-0.00914258	0.5178	0.329293	0.0122	0.461015	0.0017	-0.000282213	0.4893	0.300972	0.0289	0.23138	0.0801	0.00169144	0.4995	0.52487	0.0001	0.447083	0.0008
hsa-miR-3176	-0.0102495	0.5249	0.115943	0.2038	0.0706696	0.2953	-0.0189037	0.5453	0.0440714	0.3887	0.15946	0.1605	-0.0110787	0.5217	0.131491	0.1714	0.200297	0.1231	-0.0225305	0.5553	0.183814	0.0914	6.06327e-05	0.5019	0.0363272	0.3582	0.360076	0.0051	0.251222	0.0352
hsa-miR-3177-3p	-0.00868276	0.5253	0.0163715	0.4377	0.060222	0.3966	0.0832027	0.2397	-0.0195413	0.5551	0.162158	0.1457	-0.00827605	0.505	-0.00810092	0.5108	0.137205	0.1354	0.00698324	0.4704	-0.00821227	0.519	0.0460796	0.3518	-0.007345	0.516	0.0561766	0.3522	0.159072	0.1044
hsa-miR-32-3p	0.0207934	0.4568	-0.00452741	0.5141	0.0810975	0.3612	-0.0141319	0.5334	0.00366386	0.4833	0.075137	0.3579	0.0192555	0.448	-0.0134218	0.5246	0.136149	0.298	0.0369549	0.3961	0.0732848	0.3747	0.107422	0.2129	-0.0398438	0.5755	0.2275	0.067	0.391895	0.0014
hsa-miR-32-5p	0.0226258	0.457	0.446542	0.0079	0.75158	0.0004	-0.0188855	0.544	0.457487	0.012	0.788061	0.0001	-0.01019	0.5254	0.485675	0.0032	0.831935	0	-0.0265381	0.5486	0.46125	0.0697	0.552095	0.0647	-0.0218832	0.5313	0.75012	0	0.80968	0.0005
hsa-miR-3200-3p	0.0163255	0.4298	0.170593	0.1209	0.486256	0.001	-0.00583655	0.5087	0.36071	0.0214	0.600918	0.0001	-0.0382427	0.5959	0.209166	0.1176	0.547815	0.0004	-0.028901	0.5605	0.376194	0.0207	0.318827	0.0842	-0.0407377	0.5815	0.424559	0.008	0.587559	0.0001
hsa-miR-320a	-0.0317608	0.5842	0.179874	0.1309	0.427496	0.0023	0.0158292	0.4759	0.257735	0.0686	0.518513	0.0004	0.087138	0.3291	0.291749	0.0102	0.587231	0.0001	0.0101773	0.4609	0.314767	0.0303	0.28951	0.0306	0.0869648	0.2838	0.461312	0.0008	0.556046	0.0003
hsa-miR-324-3p	-0.0276987	0.578	0.159149	0.1126	0.506031	0.0003	-0.000378642	0.4814	0.180942	0.0695	0.569769	0.0007	-0.0332593	0.6034	0.185729	0.231	0.673957	0.0001	-0.0308937	0.5649	0.308421	0.0295	0.324391	0.0352	-0.0105433	0.5164	0.491639	0.0007	0.673726	0
hsa-miR-324-5p	-0.00989623	0.5105	0.360706	0.0167	0.712893	0	0.00715097	0.4792	0.37646	0.0158	0.713945	0	-0.0254047	0.5502	0.292224	0.0424	0.707486	0.0001	-0.0310991	0.5576	0.439783	0.0233	0.412262	0.0122	-0.0314914	0.5884	0.643822	0	0.671179	0.0004
hsa-miR-326	0.0163945	0.4708	0.181389	0.1275	0.338846	0.0446	0.0554675	0.3979	0.122286	0.2335	0.431101	0.0056	0.0770719	0.2467	0.140305	0.1548	0.493815	0.0021	-0.0520293	0.6476	0.316028	0.0206	0.214431	0.1108	-0.0172309	0.5451	0.441473	0.0098	0.48089	0.0046
hsa-miR-328-3p	0.0600726	0.3417	0.135353	0.2249	0.555911	0.0002	0.0893094	0.2546	0.203078	0.0614	0.601834	0.0001	-0.0241264	0.5499	0.120127	0.2604	0.602217	0.0001	-0.0232161	0.5491	0.259198	0.0609	0.445261	0.0041	-0.0380563	0.6048	0.434608	0.0121	0.587312	0.0004
hsa-miR-330-3p	-0.00497754	0.5056	-0.000170573	0.4872	0.0192321	0.4125	-0.00342162	0.5013	0.0130789	0.4672	0.0819276	0.2133	0.00273466	0.4874	-0.00750405	0.511	0.153391	0.0896	-0.0260298	0.5768	0.00438097	0.4836	0.0768448	0.2531	-0.025878	0.574	0.0656951	0.3109	0.0888288	0.2342
hsa-miR-330-5p	0.0627668	0.2938	0.529083	0.0002	0.573035	0.0048	0.0238154	0.4189	0.440876	0.0121	0.661861	0.0001	0.0735006	0.2608	0.511098	0.0008	0.624534	0.0286	-0.0121767	0.5212	0.481955	0.001	0.371684	0.0207	0.000458713	0.4988	0.592357	0	0.502052	0.0061
hsa-miR-331-3p	-0.0124166	0.5294	-0.0203149	0.5494	0.209065	0.1772	-0.042439	0.5921	0.0140876	0.452	0.193319	0.1021	-0.0307238	0.5743	-0.0132115	0.5224	0.282074	0.0834	-0.00993615	0.5105	0.000494192	0.4923	0.135894	0.204	-0.0269342	0.5667	0.0253216	0.3903	0.295843	0.0178
hsa-miR-331-5p	0.0117964	0.4713	0.104564	0.1996	0.2372	0.047	-0.0118688	0.5283	0.160573	0.0778	0.307095	0.0132	-0.0121689	0.5381	0.099631	0.2355	0.310997	0.0103	0.00105277	0.4936	0.222499	0.023	0.185702	0.0697	-0.00891015	0.5168	0.292076	0.0145	0.269913	0.0598
hsa-miR-335-3p	-0.0287586	0.5494	0.170346	0.1076	0.337122	0.026	0.00106014	0.4925	0.0762424	0.3025	0.409195	0.0331	0.000387136	0.4835	0.18519	0.1233	0.478843	0.0011	-0.0134083	0.5272	0.207553	0.0863	0.223198	0.1143	-0.0489452	0.5876	0.370741	0.0155	0.509733	0.0012
hsa-miR-335-5p	-0.00933366	0.5175	-0.0303603	0.5633	0.0353033	0.4301	-0.0389501	0.5744	0.0102471	0.4731	0.159691	0.1415	-0.0459353	0.5681	0.114645	0.2531	0.118319	0.2784	-0.0425235	0.5876	-0.0147815	0.5273	0.119788	0.3266	-0.0314903	0.5715	0.0252527	0.4562	0.274589	0.0803
hsa-miR-338-3p	-0.0367137	0.5715	0.0179458	0.4717	0.355459	0.0401	-0.0496891	0.5893	0.0615369	0.3734	0.642003	0.0007	-0.0486094	0.5627	0.00931172	0.4896	0.629395	0.0001	-0.0607047	0.6372	0.152908	0.2366	0.397771	0.0871	-0.00425937	0.5088	0.319268	0.1255	0.65354	0.0001
hsa-miR-338-5p	-0.0131884	0.5294	0.00363924	0.4909	-0.00634932	0.5166	-0.0023944	0.4955	0.0387296	0.3393	-0.00431815	0.5075	0.0144912	0.4568	-0.0157074	0.5273	0.0605415	0.2879	-0.0134645	0.5276	0.0784564	0.2643	0.0766059	0.2789	-0.0139244	0.5329	0.0273337	0.421	0.0927549	0.3451
hsa-miR-33a-3p	0.0258447	0.4596	0.0895804	0.2869	0.446016	0.0578	-0.0239821	0.5559	0.110343	0.2617	0.555815	0.0007	-0.0102779	0.5176	0.0882316	0.3023	0.608616	0.0005	0.0267123	0.4415	0.194044	0.1117	0.324589	0.066	-0.0143189	0.5244	0.419264	0.0377	0.61257	0.0014
hsa-miR-33a-5p	-0.0151991	0.5319	0.136539	0.2152	0.355534	0.0126	-0.0031942	0.5132	0.140943	0.227	0.494346	0.0028	-0.0346264	0.5755	0.10129	0.295	0.516713	0.0002	-0.0424522	0.5928	0.25598	0.0652	0.274873	0.0521	-0.025744	0.5467	0.329951	0.0238	0.541429	0.0006
hsa-miR-33b-3p	-0.0211477	0.554	0.00405269	0.4857	-0.00537315	0.5191	-0.00210662	0.5011	-0.0326164	0.5495	0.00925266	0.4779	-0.0129255	0.5259	-0.0420655	0.5802	-0.0202701	0.5517	-0.0366347	0.5822	-0.0279596	0.563	-0.021231	0.5669	-0.0346103	0.5754	-0.0348699	0.5738	0.0054584	0.4781
hsa-miR-33b-5p	-0.037441	0.5867	0.0153569	0.4852	0.135989	0.3368	-0.0432943	0.5826	0.05189	0.3767	0.115874	0.272	-0.0565359	0.6082	0.0293236	0.458	0.165083	0.2843	-0.0305553	0.5554	0.0755696	0.3707	0.12211	0.3485	-0.0450731	0.601	0.0569445	0.3686	0.135154	0.3186
hsa-miR-340-3p	-0.0349926	0.5673	0.0235948	0.4354	0.450185	0.0035	-0.0346379	0.5924	0.0137704	0.4565	0.646134	0.0001	-0.0093515	0.5204	0.0797683	0.2989	0.706163	0.0003	-0.0280795	0.5597	0.140137	0.2102	0.307306	0.0632	-0.0159961	0.5274	0.371323	0.0366	0.678583	0.0002
hsa-miR-340-5p	0.0288344	0.4622	0.212518	0.1495	0.608021	0.0026	-0.0285647	0.5492	0.121302	0.2685	0.721042	0.0003	0.00252854	0.4758	0.280653	0.1077	0.780349	0.0002	0.00117803	0.4938	0.359062	0.0646	0.358998	0.0616	0.173039	0.2465	0.622447	0.0005	0.749838	0
hsa-miR-342-3p	-0.0392558	0.6026	0.498556	0.0031	0.710956	0	-0.03602	0.5716	0.57822	0.0004	0.778736	0	0.0498051	0.3936	0.651248	0	0.833154	0	-0.0449776	0.5893	0.354286	0.0736	0.41326	0.0202	0.0039332	0.4869	0.699094	0	0.769964	0.0001
hsa-miR-342-5p	-0.0237431	0.5466	0.274108	0.0267	0.454559	0.0009	-0.0149914	0.5375	0.414416	0.0011	0.593577	0.0001	0.00013415	0.4937	0.426187	0.0011	0.613253	0	-0.0301449	0.5788	0.283901	0.047	0.305281	0.0442	0.0177953	0.4681	0.510197	0	0.557927	0.0002
hsa-miR-345-5p	-0.031421	0.5715	0.586928	0.0025	0.681165	0.0007	-0.0448488	0.5773	0.541982	0.0036	0.814004	0.0001	0.00567157	0.4829	0.627128	0.0004	0.839528	0	-0.0559192	0.6215	0.519456	0.0129	0.575888	0.0113	-0.0641798	0.6293	0.800198	0	0.814321	0
hsa-miR-34a-3p	-0.0298705	0.5372	0.00175565	0.4933	0.078645	0.217	-0.0090846	0.5294	0.0144138	0.4609	0.116073	0.1778	0.00211062	0.5045	-0.0100784	0.5159	0.167423	0.1532	-0.0307852	0.5782	0.0392218	0.3584	0.0069902	0.4714	-0.0358527	0.5683	0.0413067	0.4027	0.21397	0.0743
hsa-miR-34a-5p	-0.0493097	0.6035	0.119468	0.2295	0.301075	0.0572	-0.0123801	0.526	0.12783	0.28	0.312765	0.0329	-0.0248561	0.5518	0.165587	0.1297	0.350021	0.0263	-0.0414227	0.5594	0.153955	0.287	0.198366	0.21	-0.0408591	0.5902	0.378948	0.0185	0.354509	0.0106
hsa-miR-34c-5p	-0.0260433	0.5685	0.0927754	0.2086	0.382475	0.0156	0.0304483	0.4081	0.0421487	0.3303	0.531267	0.001	-0.00935987	0.5181	0.0367236	0.4311	0.591757	0.0008	-0.0239574	0.5381	0.0613714	0.4333	0.163353	0.2843	-0.022865	0.5491	0.35851	0.0146	0.576146	0.0027
hsa-miR-3605-5p	-0.0289061	0.548	0.0274305	0.4134	0.0170347	0.4293	-0.0128884	0.5271	0.0230746	0.4248	0.0626153	0.3072	-0.0127576	0.5252	0.0123652	0.4322	0.0594062	0.3024	-0.0217725	0.564	0.0155627	0.4533	0.0637817	0.3051	-0.000245834	0.4958	0.0862841	0.2422	0.10364	0.237
hsa-miR-3607-3p	-0.0170436	0.5347	0.0169763	0.4389	-0.0148422	0.538	-0.00723952	0.5113	0.00863954	0.4754	-0.0265187	0.5648	-0.0326056	0.5725	-0.0242032	0.5658	0.0322838	0.4204	-0.0309386	0.5701	0.021931	0.4135	-0.0266103	0.5787	-0.0375953	0.5938	0.0117696	0.4635	-0.00682507	0.5203
hsa-miR-3609	-0.0317631	0.5699	-0.018864	0.533	-0.0289594	0.5591	-0.00789158	0.5179	-0.0223931	0.5528	-0.000588197	0.4984	-0.0108031	0.5198	-0.0179291	0.5404	-0.0132223	0.5257	0.0469224	0.4324	-0.0311681	0.5472	0.067109	0.3018	0.109966	0.1872	0.0017707	0.4992	0.00374566	0.4951
hsa-miR-361-3p	-0.00300328	0.4973	0.381775	0.0161	0.664073	0	-0.0429511	0.6048	0.380137	0.015	0.710118	0.0001	0.0378951	0.4044	0.417788	0.0122	0.732341	0	-0.0457955	0.6099	0.352154	0.0478	0.431625	0.0166	-0.0222512	0.5678	0.656992	0.0001	0.704554	0.0005
hsa-miR-361-5p	0.0188593	0.4534	0.596914	0.0335	0.673323	0.0009	0.0907133	0.3412	0.51114	0.0061	0.748779	0.0001	-0.0157268	0.5239	0.507255	0.0089	0.777174	0	-0.0480895	0.5593	0.463373	0.0255	0.460122	0.0311	-0.0492244	0.5948	0.83332	0	0.789713	0
hsa-miR-3614-5p	0.00924041	0.483	0.256634	0.1106	0.249423	0.0399	0.0123767	0.4679	0.248281	0.0748	0.305266	0.1265	0.0253247	0.407	0.287946	0.0356	0.400269	0.0075	0.000571007	0.4932	0.188882	0.2454	0.0995033	0.3847	0.0331414	0.3761	0.307232	0.0327	0.30786	0.0603
hsa-miR-3615	-0.0323931	0.5491	0.312588	0.013	0.547242	0.0002	0.00892754	0.4745	0.269184	0.091	0.598421	0.0002	-0.0358671	0.5719	0.358305	0.0041	0.67106	0	-0.030932	0.558	0.29579	0.1397	0.396034	0.0182	-0.0388131	0.5746	0.533186	0.0001	0.65598	0.0001
hsa-miR-362-3p	0.0186783	0.4482	0.000210623	0.4915	0.365401	0.0048	0.00369346	0.4922	-0.00929376	0.5208	0.464091	0.002	-0.000745684	0.5085	-0.0144881	0.5235	0.520878	0.0049	-0.0353294	0.5578	0.0715184	0.2993	0.331548	0.0643	-0.0181328	0.5459	0.216607	0.1088	0.598377	0.0001
hsa-miR-362-5p	-0.0260168	0.5653	0.401367	0.0028	0.70271	0.0002	-0.0387938	0.5692	0.2884	0.0271	0.713887	0.0003	0.181303	0.0949	0.343478	0.0412	0.769615	0	-0.047916	0.6437	0.387141	0.0244	0.420285	0.0246	0.0373961	0.427	0.602565	0.0004	0.772432	0
hsa-miR-3620-3p	-0.00873481	0.523	0.0227507	0.4266	0.0163848	0.4475	-0.00716953	0.5134	-0.0110452	0.5248	0.00563297	0.4536	0.00222866	0.4678	0.0447983	0.3929	0.0466226	0.3883	-0.00134893	0.493	0.0139083	0.4693	0.0497726	0.3608	-0.0164136	0.5438	0.00219932	0.4838	0.100021	0.1662
hsa-miR-363-3p	0.0335907	0.358	0.0985906	0.2114	0.383264	0.0057	0.042073	0.4415	0.0944875	0.2948	0.560853	0.0002	-0.0345941	0.5776	0.13359	0.1219	0.517972	0.0044	-0.0101199	0.5172	0.20513	0.0982	0.325186	0.0452	-0.00928714	0.5156	0.308834	0.0944	0.632335	0
hsa-miR-365a-3p	-0.0163587	0.5285	0.0590718	0.287	0.358195	0.0867	-0.0265022	0.5667	0.0556843	0.3683	0.544046	0.0003	-0.000162777	0.5081	0.0458572	0.3312	0.515302	0.0024	0.0389875	0.4335	0.165374	0.1722	0.296117	0.09	-0.0115444	0.5283	0.382685	0.0029	0.640029	0.0014
hsa-miR-365b-3p	-0.0160486	0.5269	0.0642659	0.2702	0.359405	0.0859	-0.0246369	0.5616	0.0556843	0.3683	0.545932	0.0003	0.000426068	0.5065	0.0458572	0.3312	0.516927	0.0024	0.0395251	0.4313	0.165374	0.1722	0.29687	0.0895	-0.0120521	0.5297	0.382685	0.0029	0.641507	0.0014
hsa-miR-3677-3p	0.0222914	0.436	0.13771	0.1644	0.346224	0.0057	-0.0310491	0.5889	0.0249561	0.395	0.424467	0.0046	-0.00886021	0.5165	0.0790565	0.3189	0.504535	0.0006	0.00575348	0.4671	0.178932	0.2542	0.212346	0.1193	0.00438791	0.489	0.34571	0.0107	0.548413	0.0021
hsa-miR-371b-5p	-0.00461776	0.5146	-0.0140275	0.5263	0.239444	0.0925	-0.0287223	0.5467	-0.00588901	0.5096	0.281726	0.0626	-0.024419	0.5541	-0.00315989	0.4981	0.36637	0.0118	-0.0306288	0.567	0.0223668	0.4434	0.261735	0.0515	-0.0229838	0.568	0.0637065	0.3133	0.380796	0.0092
hsa-miR-374a-3p	0.0131049	0.4565	0.022104	0.4524	0.150286	0.1854	-0.0373772	0.5729	0.0237868	0.4476	0.258887	0.0552	-0.00411205	0.5032	-0.0167116	0.521	0.291335	0.0543	-0.0264111	0.5597	0.0999202	0.2218	0.150542	0.2525	0.0131829	0.4675	0.22951	0.0419	0.492118	0.0105
hsa-miR-374a-5p	0.015394	0.4754	0.0130607	0.4663	0.140444	0.312	-0.0514829	0.5949	-0.0418807	0.5913	0.139596	0.2784	0.0208644	0.4624	0.101594	0.3815	0.152385	0.2134	0.152054	0.2328	0.0858263	0.3179	0.0337903	0.4564	-0.0426821	0.5575	0.0812477	0.3634	0.126733	0.2327
hsa-miR-374b-3p	-0.00601784	0.5137	-0.0120326	0.5275	0.141268	0.2709	0.00694336	0.4829	-0.0269942	0.5549	0.253488	0.0178	0.0434861	0.3573	-0.0188645	0.5309	0.241193	0.0698	-0.00548113	0.5108	0.0763896	0.2764	0.0154529	0.4572	0.00145581	0.4939	0.221777	0.106	0.199593	0.1193
hsa-miR-374b-5p	-0.0416386	0.5745	-0.0292173	0.5663	0.158959	0.2527	-0.00167045	0.4933	-0.0259636	0.5557	0.315313	0.0142	-0.00281374	0.4943	-0.0129992	0.5211	0.331707	0.0204	-0.0465194	0.5898	0.0519739	0.4069	0.133742	0.2592	-0.01812	0.5233	0.300764	0.0239	0.385628	0.0247
hsa-miR-375	-0.0526375	0.5906	0.0283586	0.4527	0.00256428	0.5064	0.00334961	0.4909	-0.00948893	0.5229	0.191849	0.0632	-0.0461759	0.567	-0.0200778	0.5433	0.141164	0.2148	0.00315294	0.4912	0.0555658	0.318	0.0771649	0.353	-0.0567445	0.6097	0.0241709	0.4311	0.191431	0.1627
hsa-miR-378a-3p	-0.0344272	0.5869	0.48631	0.0028	0.651236	0.0003	-0.0412014	0.5602	0.500565	0.0013	0.764173	0.0001	0.039777	0.4205	0.490129	0.0023	0.805169	0	-0.0453815	0.5976	0.425131	0.0136	0.463624	0.016	0.000463018	0.499	0.697067	0	0.778766	0
hsa-miR-378a-5p	-0.00764946	0.5091	0.127828	0.2363	0.463084	0.0049	-0.0226012	0.5388	0.0612145	0.3834	0.589314	0.0003	-0.01435	0.5297	0.0450861	0.3919	0.654904	0.0002	-0.043427	0.5974	0.200141	0.2439	0.291227	0.0674	-0.021634	0.5521	0.54529	0.001	0.697083	0
hsa-miR-3909	-0.0157171	0.538	0.121102	0.156	0.375283	0.0062	-0.0383152	0.5839	0.0941219	0.2137	0.451135	0.0016	-0.00759313	0.4985	0.0274689	0.4199	0.56581	0.0001	-0.0214659	0.5404	0.145499	0.2336	0.280459	0.1696	-0.0247008	0.5641	0.38278	0.0075	0.523073	0.0077
hsa-miR-3912-3p	0.0146721	0.4668	0.0506282	0.3204	0.0539293	0.3576	0.00843098	0.4677	0.020708	0.4064	0.136059	0.1552	0.00121764	0.4982	0.00399954	0.4826	0.105514	0.1623	-0.0138504	0.5258	0.0476315	0.3618	0.0593914	0.3004	0.0343434	0.39	0.035909	0.3618	0.228111	0.0707
hsa-miR-3928-3p	-0.0194484	0.5577	-0.0126583	0.5365	0.0363251	0.3558	-0.0110009	0.5216	0.00762508	0.4696	0.0119162	0.4531	-0.00895677	0.5216	-0.00867079	0.5128	0.0684544	0.2419	0.00288246	0.4698	-0.00393819	0.5062	0.0254907	0.4259	-0.000128993	0.4857	0.0312288	0.3811	0.120334	0.1458
hsa-miR-421	-0.0518869	0.6211	0.565869	0.0174	0.701863	0.0007	-0.0425514	0.5981	0.487753	0.006	0.763961	0.0002	0.027991	0.4147	0.536858	0.0041	0.783914	0	-0.0106423	0.5256	0.505383	0.0261	0.516469	0.0149	-0.0308949	0.5502	0.807063	0	0.778725	0
hsa-miR-423-3p	-0.0353456	0.5707	0.427775	0.0082	0.609529	0.0005	-0.031442	0.5661	0.455352	0.0183	0.746962	0	0.0010038	0.492	0.461569	0.0075	0.734965	0.0001	-0.0343176	0.5623	0.418923	0.0283	0.45464	0.0265	-0.0282757	0.5642	0.694807	0	0.764126	0.0001
hsa-miR-423-5p	-0.044034	0.6119	0.140955	0.2847	0.578456	0.0023	-0.0389062	0.5644	0.176513	0.2266	0.667833	0.0001	0.0736955	0.3538	0.227431	0.2492	0.722739	0.0006	-0.0370021	0.5718	0.305401	0.1149	0.384778	0.0504	0.0203088	0.4709	0.546815	0.0003	0.72756	0.0001
hsa-miR-424-3p	0.066338	0.3208	0.41494	0.0235	0.790076	0	0.122717	0.2529	0.559579	0.0009	0.880766	0	0.229432	0.0815	0.558764	0.0004	0.891983	0	0.039954	0.4405	0.376718	0.0474	0.590056	0.0126	0.0972202	0.3333	0.71707	0.0011	0.895558	0
hsa-miR-424-5p	-0.0659993	0.6469	-0.00707709	0.5114	0.220296	0.2753	-0.0283566	0.5806	0.110713	0.2989	0.340411	0.0253	-0.0617232	0.6432	0.187583	0.206	0.352717	0.0076	-0.0626035	0.673	-0.0099331	0.5163	0.112996	0.3055	-0.0421438	0.6013	0.174588	0.1732	0.423206	0.0043
hsa-miR-425-3p	-0.0056331	0.5122	0.541872	0.0006	0.513787	0.0004	-0.025231	0.5707	0.513006	0.0005	0.549703	0.0005	0.0194564	0.4618	0.521132	0.0002	0.56433	0.0001	-0.017646	0.5357	0.525337	0.034	0.311697	0.0471	0.00324351	0.4886	0.659693	0	0.533158	0.007
hsa-miR-425-5p	-0.0298498	0.5617	0.363015	0.0455	0.581378	0.0008	-0.0470685	0.5589	0.450233	0.0231	0.663964	0.0003	-0.0418966	0.5641	0.434473	0.0574	0.755065	0	-0.0330939	0.5688	0.380416	0.0867	0.3406	0.0451	-0.0374223	0.5876	0.536018	0.0002	0.654901	0.0015
hsa-miR-429	-0.0165597	0.5273	0.0457469	0.378	0.32112	0.0162	0.00240098	0.4852	0.147752	0.139	0.387238	0.0026	0.0289291	0.4072	0.0180877	0.4701	0.395396	0.0078	0.0204856	0.4762	0.219665	0.058	0.314978	0.039	-0.0220876	0.5403	0.230783	0.1101	0.415618	0.0053
hsa-miR-4326	-0.019999	0.507	0.0568202	0.3549	0.199006	0.3431	-0.0132736	0.5194	0.0626223	0.4087	0.405655	0.1279	0.0120416	0.4827	0.0413812	0.4151	0.471451	0.0163	0.0389026	0.3863	0.00473297	0.4938	0.209911	0.274	0.0522717	0.3583	0.0586682	0.4382	0.547612	0.0046
hsa-miR-449a	0.0101057	0.485	0.087291	0.3708	0.0225569	0.4792	0.0151419	0.468	0.130179	0.1243	0.0882341	0.2525	0.00807479	0.4904	0.138374	0.1113	0.145971	0.173	0.00166294	0.491	0.00906569	0.4865	-0.00597753	0.5085	0.0248179	0.4587	-0.00877848	0.5197	0.21414	0.173
hsa-miR-449b-5p	0.0271512	0.4399	0.137774	0.2726	0.503347	0.0035	0.000738683	0.4883	0.108365	0.3223	0.549998	0.0002	0.0683782	0.3644	0.167777	0.0858	0.604289	0.0002	0.103761	0.2758	0.0433457	0.4294	0.414308	0.019	0.0371746	0.448	0.078576	0.2899	0.586475	0.0002
hsa-miR-449c-5p	0.0446019	0.3912	0.258214	0.1435	0.382839	0.0253	0.0266284	0.4619	0.277724	0.0305	0.449705	0.0023	0.0917409	0.3065	0.280449	0.1043	0.598425	0.0007	0.0603014	0.3594	0.105848	0.3193	0.256434	0.2021	-0.0230779	0.5436	0.125589	0.2481	0.507943	0.0041
hsa-miR-450b-5p	0.00801225	0.4869	0.0844781	0.4075	0.177678	0.2015	0.0772484	0.3876	0.177529	0.2886	0.340209	0.0279	-0.025896	0.5422	0.166673	0.2632	0.347353	0.0448	-0.0191133	0.5379	0.0255862	0.4591	0.113468	0.3092	-0.00759625	0.5126	0.0685621	0.373	0.318512	0.0159
hsa-miR-451a	-0.0171066	0.54	0.193805	0.2125	0.138842	0.3459	0.0103717	0.4727	0.279052	0.202	0.131427	0.3819	-0.0313018	0.5595	0.111815	0.344	0.101934	0.4132	-0.0134575	0.528	0.290486	0.087	0.0819813	0.3778	0.0839021	0.3809	0.264258	0.0883	0.18357	0.3503
hsa-miR-4521	-0.0195704	0.5323	-0.0502006	0.5941	-0.0477883	0.6219	-0.0410512	0.5607	-0.0565348	0.6375	-0.0549171	0.6102	-0.0284993	0.5582	-0.0505733	0.5949	-0.0306598	0.571	-0.0342896	0.5749	-0.0421845	0.5825	-0.0511195	0.6088	-0.049474	0.6142	-0.0417739	0.591	-0.0444145	0.5956
hsa-miR-4524a-5p	-0.0160013	0.5311	-0.0195075	0.5378	0.115067	0.2329	-0.00897311	0.5009	0.0801269	0.3805	0.157522	0.0922	-0.00371267	0.5061	0.0252802	0.4139	0.226529	0.0515	0.00742878	0.4916	0.0526854	0.3124	0.0526205	0.3613	0.0462066	0.4279	0.188322	0.0857	0.230241	0.063
hsa-miR-454-3p	0.0209163	0.4577	0.408653	0.0048	0.54702	0.0002	-0.0355189	0.5478	0.384993	0.0202	0.626046	0.0004	0.0292772	0.4571	0.425453	0.0512	0.723176	0	0.02621	0.4566	0.314922	0.0663	0.31735	0.0332	-0.0115194	0.5098	0.538893	0.0005	0.68151	0.0033
hsa-miR-454-5p	0.0025524	0.4765	0.066057	0.3121	0.408446	0.0177	-0.016356	0.5476	0.0299714	0.4308	0.524859	0.0017	-0.0395386	0.5883	0.104236	0.2325	0.537256	0.0001	0.0381158	0.3773	0.186475	0.1414	0.346989	0.0348	-0.0396503	0.5888	0.358789	0.0159	0.567717	0.0004
hsa-miR-4645-3p	0.00234033	0.4938	-0.0371844	0.6174	-0.0178705	0.5508	0.028615	0.4454	-0.0092391	0.5246	0.0673629	0.2519	0.0448274	0.3845	-0.00288065	0.5068	0.045244	0.3349	0.0388331	0.4025	-0.0132444	0.5347	0.0040621	0.479	-0.0163134	0.5396	0.00460545	0.4814	0.0321142	0.389
hsa-miR-4661-5p	0.000314334	0.4909	0.0981235	0.1978	0.0997792	0.1825	0.0587256	0.2825	0.172552	0.0856	0.137381	0.1202	-0.0310255	0.5797	0.061547	0.3165	0.0910184	0.2961	-0.0127337	0.5241	0.0913231	0.313	0.124398	0.1881	0.00501969	0.4895	0.160629	0.0949	0.234123	0.0554
hsa-miR-4671-3p	-0.0411814	0.5433	-0.0378855	0.5346	-0.00518583	0.505	-0.0416316	0.5559	-0.0552599	0.5772	0.130449	0.3585	-0.0209326	0.5259	-0.00863426	0.5016	0.137974	0.3557	-0.0491193	0.5605	-0.0175976	0.5211	0.0224495	0.4704	-0.0287959	0.5281	0.101448	0.3907	0.144728	0.337
hsa-miR-4677-3p	0.00385082	0.4791	0.0433498	0.3949	0.134827	0.2428	0.0191174	0.4589	0.0371197	0.4337	0.358786	0.0228	-0.0188751	0.535	0.0607971	0.4281	0.341863	0.0522	-0.0070314	0.5169	0.249986	0.0533	0.151116	0.2995	-0.0234534	0.5432	0.265207	0.0476	0.509643	0.0089
hsa-miR-4685-3p	-0.0114474	0.5313	0.131631	0.1832	0.0969467	0.1776	-0.011019	0.5219	0.0892792	0.2297	0.16133	0.1317	-0.00803276	0.5157	0.0419797	0.3823	0.124362	0.2129	-0.0178479	0.5409	0.0600328	0.3312	0.0967537	0.2036	-0.0318467	0.5801	0.0610303	0.3349	0.260951	0.0281
hsa-miR-4687-5p	0.0500915	0.339	0.0466068	0.3685	-0.0120451	0.5312	0.0537925	0.3333	-0.0297848	0.5845	0.0419925	0.4049	0.0960663	0.2755	-0.0200974	0.5413	0.0138616	0.4568	-0.017915	0.5364	0.0233092	0.4418	0.0358467	0.4297	0.0192227	0.4419	-0.0100692	0.5123	0.0704597	0.3356
hsa-miR-4746-5p	0.0303768	0.3795	-0.0275042	0.5734	0.0247235	0.4362	-0.00482368	0.5081	-0.0333703	0.5795	0.0894498	0.2087	0.00961955	0.4783	0.0258804	0.447	0.0492924	0.3297	0.0610644	0.3856	-0.0139192	0.5405	0.0144487	0.4504	-0.0102624	0.5178	0.0682518	0.3357	0.0919277	0.3708
hsa-miR-4767	-0.0183326	0.5438	0.0428524	0.3632	0.0818041	0.3395	0.0114551	0.4615	0.0825761	0.2943	0.134747	0.1502	-0.0113628	0.5214	0.0876792	0.2467	0.182564	0.0931	-0.0046336	0.5032	0.157296	0.1433	0.0492435	0.3765	-0.0180806	0.555	0.256935	0.0532	0.142129	0.1016
hsa-miR-4775	-0.00600148	0.5115	-0.0478395	0.6344	0.00926151	0.4866	-0.0200641	0.5363	-0.0192763	0.5361	0.0647636	0.2897	-0.0370081	0.5753	-0.0516879	0.5791	0.00801681	0.4822	-0.0396456	0.5935	-0.0281968	0.5571	0.0160597	0.4517	-0.0181282	0.5196	0.0155267	0.446	0.127178	0.2268
hsa-miR-4787-3p	0.00879274	0.4662	0.309948	0.0063	0.359932	0.0033	-0.0131585	0.5213	0.293358	0.0127	0.378619	0.0135	-0.0120597	0.5338	0.359445	0.0134	0.431186	0.001	0.0102805	0.4362	0.335334	0.0049	0.228672	0.0757	-0.0318729	0.5763	0.455818	0.0007	0.441638	0.0016
hsa-miR-4802-3p	-0.0150275	0.541	0.010915	0.456	0.0482728	0.3427	0.0131647	0.4677	0.0177359	0.4184	0.158457	0.1193	0.00430773	0.4755	-0.00806955	0.5064	0.185728	0.1336	-0.0114076	0.5264	0.0168396	0.4504	0.104883	0.2405	-0.0303068	0.5788	0.242319	0.0331	0.257009	0.023
hsa-miR-484	0.00336942	0.481	-0.0244709	0.5467	0.128807	0.2639	0.0352404	0.3718	0.156284	0.1817	0.336842	0.0094	0.0329822	0.4157	0.0430433	0.3564	0.327769	0.0168	-0.0197146	0.5504	0.0100829	0.4656	0.138235	0.2132	-0.0449021	0.601	0.0587607	0.3485	0.27344	0.1349
hsa-miR-489-3p	0.021263	0.4483	0.0348076	0.4022	0.159486	0.1604	0.128187	0.2806	0.0359939	0.3905	0.215453	0.1928	-0.0353235	0.5781	0.0393654	0.3356	0.320085	0.0655	0.00729339	0.4729	0.0747849	0.3601	0.128681	0.3201	-0.00872637	0.5213	0.092494	0.207	0.455354	0.0029
hsa-miR-499a-5p	0.0131417	0.4765	0.124057	0.3319	0.210714	0.1311	-0.011526	0.5168	0.0332377	0.4487	0.286309	0.0507	0.0112285	0.494	0.12105	0.2307	0.296105	0.0477	-0.0241043	0.5371	0.087176	0.3186	0.161998	0.2055	0.00951008	0.4809	0.1245	0.3008	0.404721	0.0282
hsa-miR-5001-3p	-0.0187496	0.535	0.184291	0.0879	0.489423	0.0008	-0.00154262	0.494	0.111247	0.2067	0.550022	0.0004	-0.00938106	0.5081	0.214636	0.0897	0.546464	0.0002	0.0256147	0.4259	0.318416	0.0481	0.298759	0.0896	0.0379191	0.4064	0.515829	0.0038	0.464125	0.0014
hsa-miR-500a-3p	-0.00286872	0.5085	0.00520029	0.4937	0.0601859	0.397	-0.0131434	0.5156	-0.0128905	0.5206	0.127128	0.2338	-0.0513476	0.6059	-0.0131031	0.5197	0.186814	0.1553	-0.0510879	0.6067	0.0615602	0.4054	0.0856793	0.3461	-0.0415059	0.5783	0.140175	0.3216	0.185264	0.2631
hsa-miR-500a-5p	-0.0145338	0.5296	0.0662153	0.2705	0.135242	0.1944	0.0336121	0.4252	0.0328667	0.3883	0.270838	0.0551	-0.0301455	0.5714	0.0186764	0.4346	0.392855	0.0028	-0.0326358	0.5682	0.109705	0.2193	0.199901	0.1284	-0.0121911	0.5192	0.165224	0.1735	0.479658	0.001
hsa-miR-500b-3p	0.00952931	0.4859	0.0561699	0.3184	0.0194558	0.4478	0.0275758	0.4558	0.038611	0.3841	0.0451514	0.3841	0.0256225	0.4528	0.0361925	0.4118	0.0301647	0.4606	-0.0241703	0.5524	0.054111	0.4032	0.00530175	0.4758	-0.00847633	0.5151	0.0188348	0.4699	0.0752633	0.302
hsa-miR-501-3p	-0.000946771	0.4976	0.00706436	0.486	0.284137	0.0416	0.00189806	0.4884	0.0179664	0.475	0.369795	0.011	-0.0477863	0.5894	0.0131907	0.4922	0.487662	0.0103	-0.0485326	0.599	0.119913	0.2711	0.196329	0.1744	-0.0452167	0.5822	0.210259	0.2498	0.39911	0.01
hsa-miR-501-5p	-0.0295992	0.5871	0.0372062	0.3717	0.329655	0.0228	0.0329599	0.3979	0.0987016	0.2156	0.381308	0.0045	-0.00188094	0.499	0.0559843	0.3668	0.463443	0.002	-0.00268309	0.5027	0.133294	0.2306	0.206857	0.154	-0.00118231	0.4903	0.251257	0.1305	0.526809	0.0003
hsa-miR-5010-3p	0.0138421	0.4839	0.00360564	0.4799	0.0282382	0.4584	-0.0258262	0.5561	-0.00256852	0.5026	0.0349455	0.3946	-0.0277172	0.5709	0.0050791	0.4834	0.121236	0.126	0.0101434	0.4532	-0.0215257	0.5523	0.0105136	0.4734	-0.0189502	0.5599	0.0980916	0.314	0.115437	0.323
hsa-miR-502-3p	0.0156775	0.4809	-0.0248173	0.5481	0.172969	0.2233	-0.0487742	0.569	-0.0251725	0.5411	0.248483	0.0873	-0.0431772	0.5732	-0.0132807	0.5165	0.420143	0.0157	-0.0479388	0.5969	-0.0169642	0.536	0.223617	0.0526	-0.0438308	0.594	0.0447901	0.442	0.322869	0.0351
hsa-miR-503-5p	-0.00336882	0.5099	0.154824	0.0861	0.318957	0.0158	-0.0337508	0.6049	0.118005	0.1228	0.441915	0.0019	0.000511747	0.485	0.135028	0.16	0.480696	0.0019	-0.00788402	0.5141	0.277637	0.0886	0.249969	0.098	-0.00343241	0.5021	0.451694	0.0011	0.536317	0.0004
hsa-miR-505-3p	0.0396593	0.3818	0.246878	0.0638	0.451228	0.0025	-0.00125898	0.486	0.133457	0.2304	0.457191	0.0015	-0.0207239	0.5468	0.224	0.0364	0.496117	0.0016	-0.0182837	0.555	0.263286	0.0589	0.324866	0.0399	-0.0146889	0.5419	0.397686	0.0016	0.462489	0.0014
hsa-miR-505-5p	0.0214166	0.4441	-0.0396144	0.6206	0.00663578	0.4916	0.0448755	0.3477	-0.0333068	0.5478	0.0534856	0.3737	-0.0125489	0.5295	-0.0426881	0.6054	0.0202579	0.4413	0.0505643	0.3661	-0.0401865	0.6213	0.0269078	0.4341	0.0204883	0.4349	-0.0281944	0.5734	0.104505	0.3004
hsa-miR-532-3p	-0.0161991	0.5444	0.109021	0.2172	0.386188	0.0121	-0.04565	0.5745	0.0373911	0.3859	0.534298	0.0008	-0.044689	0.6055	0.0961787	0.2677	0.558637	0.0007	-0.0369502	0.5675	0.1973	0.2184	0.288582	0.0683	-0.0415367	0.5897	0.353757	0.0472	0.5425	0.0028
hsa-miR-532-5p	-0.0374746	0.593	0.26	0.0496	0.639672	0.0001	-0.0484274	0.5779	0.213589	0.1073	0.694055	0.0001	-0.0297823	0.5761	0.215497	0.1126	0.72845	0	-0.0344568	0.5867	0.353444	0.0417	0.445909	0.0192	-0.0404326	0.5632	0.587268	0	0.740845	0.0001
hsa-miR-542-3p	-0.0230539	0.5528	-0.0100244	0.5236	-0.0101405	0.5165	-0.0153338	0.5399	-0.0167394	0.539	0.0741707	0.2815	-0.00776521	0.5123	-0.00304446	0.4933	0.0913813	0.3077	0.0276743	0.3908	-0.0199935	0.5562	-0.0114815	0.5267	-0.0266578	0.5665	-0.0196532	0.5428	0.14593	0.1181
hsa-miR-542-5p	-0.0333306	0.5479	-0.0351296	0.5778	0.0121824	0.4384	-0.0310994	0.543	-0.0284166	0.5661	0.0722855	0.3217	-0.0105192	0.5119	0.0321653	0.444	0.0762797	0.2487	-0.016604	0.5385	-0.0325376	0.5815	-0.0097934	0.5239	0.000104798	0.4948	0.0169515	0.4543	0.0826689	0.2829
hsa-miR-545-5p	0.0810821	0.3306	-0.0137761	0.5299	-0.0257665	0.5578	-0.0228205	0.5433	0.135075	0.1785	0.0891334	0.2443	0.0303251	0.471	0.00566699	0.4764	0.10183	0.2575	-0.0506936	0.6121	0.146347	0.0797	-0.0328549	0.5997	0.0181401	0.4673	0.0988279	0.2891	0.170855	0.1769
hsa-miR-548e-3p	-0.02246	0.5388	0.239594	0.0846	0.501617	0.0002	-0.0120826	0.5197	0.211459	0.1037	0.623605	0.0001	-0.0222422	0.5407	0.207599	0.0893	0.688054	0	-0.00751298	0.5126	0.313544	0.0234	0.395451	0.032	-0.0320728	0.587	0.506828	0.0028	0.600139	0.0004
hsa-miR-548e-5p	0.00713279	0.4892	0.12184	0.1528	0.420852	0.0008	0.011301	0.4564	0.124338	0.143	0.414603	0.0035	-0.0219545	0.5555	0.114986	0.2054	0.502156	0.0017	0.0304473	0.4358	0.182704	0.1055	0.305542	0.0288	-0.00351139	0.5003	0.48201	0.0003	0.530536	0.0003
hsa-miR-548j-5p	-0.0271219	0.5644	-0.00112441	0.4998	0.00762914	0.4926	0.0247018	0.432	0.00568988	0.4591	-0.00193691	0.4945	0.00944474	0.4521	0.0718156	0.3232	0.0180394	0.4226	-0.00748178	0.5159	0.00509105	0.4871	0.00965841	0.4777	0.0028206	0.4789	0.0565704	0.3357	0.104173	0.1894
hsa-miR-548k	-0.0277284	0.5651	-0.0215928	0.5346	-0.0373442	0.5608	-0.0355685	0.5589	-0.0203662	0.5358	0.0107555	0.4763	-0.0247728	0.5615	-0.0245674	0.5649	0.00695693	0.4818	-0.0329981	0.5699	0.0152976	0.4688	-0.0248969	0.5481	0.00789195	0.4753	0.0286986	0.3952	0.147581	0.2095
hsa-miR-551b-3p	-0.00350325	0.5107	-0.0290204	0.5697	-0.00517378	0.5124	0.015701	0.4795	-0.0178439	0.5285	0.0626649	0.3556	-0.0287914	0.5625	-0.0365846	0.5616	0.0243738	0.4411	-0.0310551	0.5495	0.0127602	0.4462	0.00595806	0.4784	-0.0161755	0.5271	-0.0311826	0.5669	0.141948	0.2012
hsa-miR-5690	-0.0210722	0.5498	-0.0189425	0.5487	0.0444876	0.3858	-0.0189501	0.5301	-0.026748	0.554	0.02278	0.4531	0.0514531	0.389	-0.0242362	0.5448	0.115945	0.2514	-0.0446423	0.597	-0.00935698	0.5224	0.101252	0.3264	-0.0164342	0.5233	-0.00476797	0.5037	0.0594576	0.3637
hsa-miR-574-3p	-0.00620948	0.5065	0.300926	0.0497	0.488612	0.0034	-0.014715	0.5173	0.276759	0.0236	0.616266	0.0004	-0.0201259	0.5357	0.276335	0.048	0.646525	0	-0.0305246	0.546	0.244378	0.0794	0.46446	0.036	0.00125149	0.4923	0.526234	0.0005	0.66288	0
hsa-miR-576-5p	-0.0608514	0.5824	-0.0153188	0.5332	0.310612	0.0252	-0.0299074	0.5507	-0.0416181	0.6056	0.368549	0.0421	-0.0450145	0.6124	-0.0508209	0.5914	0.413552	0.015	-0.0110642	0.5207	-0.00482846	0.5051	0.170276	0.183	-0.0479185	0.6098	0.182875	0.2661	0.478906	0.0089
hsa-miR-580-3p	-0.0230509	0.5589	-0.00157749	0.5004	0.103581	0.3344	-0.0215586	0.5223	-0.0431754	0.5721	0.22504	0.0726	-0.0414415	0.583	-0.0524511	0.5889	0.0925943	0.2746	-0.0286152	0.5653	-0.0241342	0.5441	0.144429	0.2118	-0.0360745	0.5713	0.0323473	0.4523	0.191832	0.1118
hsa-miR-582-3p	-0.0223906	0.5568	0.213856	0.069	0.27815	0.0139	-0.0273123	0.5576	0.236938	0.055	0.286307	0.0389	0.0176416	0.4532	0.202718	0.0997	0.283542	0.0242	-0.0339178	0.5873	0.234096	0.0563	0.159949	0.1857	0.0433414	0.3759	0.276956	0.0341	0.374506	0.0116
hsa-miR-582-5p	-0.0298858	0.5634	0.0513757	0.3278	0.345919	0.0041	0.0454386	0.3685	-0.0397022	0.6024	0.441214	0.0045	-0.0127163	0.5178	-0.0230294	0.5431	0.443576	0.0007	0.0291494	0.415	0.162174	0.1917	0.219407	0.0896	-0.0171668	0.5321	0.369748	0.0033	0.50246	0.0009
hsa-miR-589-3p	-0.00655842	0.5118	0.00249305	0.4974	0.236264	0.0505	-0.0245219	0.5445	0.0960033	0.3024	0.397643	0.0026	0.00306032	0.4954	0.0814914	0.2897	0.511953	0.0004	-0.0349786	0.5722	0.14399	0.1691	0.148071	0.2714	-0.0350258	0.5706	0.246081	0.0299	0.441735	0.002
hsa-miR-589-5p	-0.0338085	0.5674	0.283388	0.1104	0.526832	0.0023	-0.0680133	0.6252	0.131683	0.222	0.613593	0.0027	-0.0227941	0.5395	0.362934	0.1093	0.655056	0.0004	-0.0505554	0.6012	0.279978	0.1079	0.439439	0.0096	-0.0455136	0.5785	0.536811	0.0002	0.618452	0.0002
hsa-miR-590-3p	-0.0230862	0.5487	-0.0422809	0.5892	0.0153144	0.4562	-0.0350725	0.5541	-0.0128325	0.522	0.0536916	0.3763	-0.0249089	0.5335	0.000604151	0.4823	0.0962037	0.2629	-0.0534029	0.5769	-0.0416443	0.5877	0.0398564	0.3821	-0.0306587	0.5628	-0.0081869	0.5173	0.296303	0.0359
hsa-miR-598-3p	0.0768487	0.2758	-0.0170011	0.545	0.163664	0.1675	0.00904523	0.4762	-0.0262322	0.5658	0.467903	0.001	0.0380627	0.3999	-0.0290942	0.5814	0.510267	0.0004	-0.0194032	0.5524	0.00899991	0.4469	0.226421	0.0909	0.0229587	0.4326	0.0819179	0.3351	0.489609	0.0006
hsa-miR-616-5p	0.0916411	0.2973	0.257616	0.1138	0.654389	0.0179	0.0200934	0.4242	0.144616	0.2595	0.672994	0.0001	0.066328	0.2884	0.144118	0.3786	0.715561	0.0003	0.0917248	0.4007	0.241506	0.1019	0.501193	0.0068	-0.00355506	0.4999	0.473781	0.1179	0.800401	0.0001
hsa-miR-618	-0.0318329	0.5813	-0.0049895	0.5045	0.416211	0.0204	-0.00650568	0.5171	-0.0160473	0.5274	0.61225	0.0001	-0.0541624	0.6133	0.0865092	0.2605	0.653738	0	-0.036697	0.6103	0.0962629	0.3894	0.283252	0.0909	-0.0301123	0.5916	0.390155	0.0122	0.678272	0
hsa-miR-627-3p	0.0229293	0.441	-0.0247865	0.5584	0.206232	0.0708	-0.00150441	0.4994	-0.0283225	0.5517	0.0942488	0.3011	-0.0172325	0.5376	-0.0438668	0.5868	0.182844	0.1986	-0.0341696	0.5664	0.0234419	0.4517	0.128356	0.3133	-0.0126843	0.5274	-0.033619	0.5745	0.11801	0.2381
hsa-miR-627-5p	-0.028795	0.5619	-0.0420416	0.5785	-0.0398456	0.5883	-0.0145491	0.5411	-0.040151	0.605	-0.0370479	0.568	0.0285687	0.4183	-0.0168971	0.5351	0.00399028	0.4893	0.000543644	0.4911	-0.047617	0.6099	-0.0267547	0.5545	-0.0242061	0.5256	-0.0364499	0.584	0.0349493	0.4084
hsa-miR-628-3p	-0.000245004	0.4913	0.00428742	0.4646	0.0691208	0.2708	-0.0211113	0.5487	0.0044945	0.4753	0.0761247	0.3351	-0.0373642	0.5962	0.00566903	0.477	0.139797	0.1633	-0.0304489	0.5803	0.0577159	0.357	0.0943906	0.2741	-0.00286554	0.5052	0.0900978	0.3205	0.165777	0.2063
hsa-miR-628-5p	-0.0389616	0.5771	-0.0372683	0.581	0.25858	0.0699	-0.0135524	0.5385	0.00291498	0.5034	0.349027	0.01	-0.0450584	0.6039	-0.00728637	0.515	0.438758	0.0021	-0.0117337	0.5237	-0.0120785	0.5288	0.232501	0.1974	-0.0311754	0.5695	0.0880415	0.2805	0.4025	0.0066
hsa-miR-641	-0.00701779	0.5135	0.278231	0.0759	0.40758	0.0036	0.0321078	0.4051	0.224728	0.0855	0.454968	0.0006	-0.012724	0.5325	0.277246	0.0122	0.514389	0.0006	-0.0367176	0.5827	0.400357	0.0046	0.351744	0.0152	-0.0219491	0.5429	0.473367	0.0037	0.450285	0.0012
hsa-miR-6503-3p	-0.02106	0.5585	0.0521646	0.3124	0.102598	0.1748	-0.0114634	0.5207	0.0474349	0.3816	0.171404	0.057	-0.0183369	0.5512	0.0194702	0.4242	0.154351	0.1772	-0.015931	0.5391	0.0699656	0.2363	0.100096	0.2153	-0.0179683	0.5472	0.112319	0.1216	0.183182	0.0519
hsa-miR-6503-5p	-0.0204935	0.5524	0.0036365	0.4721	0.000450553	0.5038	-0.00822122	0.5103	0.00124318	0.4811	0.0294847	0.411	-0.0167896	0.539	0.0326067	0.3734	0.0104263	0.4833	-0.0215874	0.5494	0.0370897	0.376	0.04219	0.4097	0.00180156	0.4792	0.00891999	0.4603	0.068763	0.3178
hsa-miR-651-5p	-0.0198824	0.5333	0.179426	0.1395	0.18544	0.1074	-0.0442135	0.5901	0.0667903	0.3997	0.273642	0.1246	0.00291953	0.4914	0.0483945	0.3669	0.483689	0.0006	-0.016116	0.5317	0.155593	0.2334	0.245449	0.0805	0.0344899	0.4427	0.150994	0.2433	0.534317	0.0045
hsa-miR-652-3p	-0.0248164	0.581	0.117876	0.2791	0.586967	0.0001	-0.0312006	0.5679	0.125114	0.1094	0.62776	0.0001	-0.0216032	0.5526	0.0943242	0.2733	0.702089	0	-0.0382775	0.6073	0.22643	0.0672	0.312699	0.046	-0.0397714	0.6135	0.457296	0.0048	0.642314	0.0014
hsa-miR-652-5p	-0.0111489	0.528	0.0313864	0.4025	0.358524	0.0036	-0.0169294	0.5465	0.0558926	0.3397	0.456083	0.001	-0.0228896	0.549	0.10862	0.1704	0.484085	0.0016	-0.0234392	0.5463	0.236405	0.0723	0.217818	0.0682	-0.0158843	0.5382	0.372044	0.0064	0.478809	0.0002
hsa-miR-659-5p	-0.0238623	0.5512	0.0309489	0.4238	-0.0137244	0.5372	-0.0221751	0.5361	-0.0206569	0.5449	0.0203952	0.4339	-0.023706	0.5692	0.0421859	0.3428	0.0303245	0.3815	-0.0338422	0.5719	0.167818	0.1552	0.0508271	0.3543	-0.0245688	0.5617	0.0540953	0.33	0.0579458	0.3167
hsa-miR-660-3p	-0.0269713	0.5694	0.0426694	0.4134	0.178344	0.1844	-0.0351256	0.604	0.0935147	0.2215	0.26749	0.0402	-0.0206668	0.5356	0.102988	0.224	0.212736	0.1014	-0.030111	0.5618	0.0484717	0.3594	0.110594	0.1958	0.00601393	0.4933	0.188253	0.0605	0.38201	0.0113
hsa-miR-660-5p	-0.0399291	0.5728	-0.0257279	0.5435	0.113039	0.3166	-0.0245012	0.5292	-0.0468332	0.5856	0.379095	0.0807	-0.0507207	0.6091	-0.0270454	0.5454	0.424282	0.0793	-0.0225314	0.5434	-0.000330882	0.4992	0.203991	0.1711	-0.0578271	0.6312	0.15471	0.1807	0.57155	0.006
hsa-miR-664a-3p	-0.0281439	0.5611	0.130689	0.2613	0.256921	0.0279	0.120758	0.3072	0.294852	0.0097	0.360692	0.0082	0.0634645	0.309	0.313099	0.0184	0.325962	0.0885	-0.0301628	0.5764	0.237477	0.113	0.232908	0.1274	-0.0220565	0.5483	0.32758	0.0255	0.323852	0.129
hsa-miR-664a-5p	-0.0159458	0.5372	0.0047884	0.4888	0.0109543	0.441	0.0408717	0.348	-0.0245356	0.5582	0.0162064	0.4612	-0.010616	0.5173	-0.000403535	0.4853	0.023988	0.4319	-0.00792215	0.5165	-0.0168589	0.54	0.0678891	0.2629	0.014849	0.4433	-0.0136968	0.5262	0.0676502	0.3222
hsa-miR-671-5p	0.0148889	0.4525	0.21928	0.0567	0.273177	0.0315	-0.00123746	0.5072	0.193828	0.0514	0.439385	0.0209	0.0864042	0.1908	0.254123	0.0284	0.542807	0	-0.00550332	0.5046	0.249503	0.0253	0.204444	0.0761	0.0806058	0.2624	0.34608	0.0101	0.551491	0
hsa-miR-6718-5p	-0.0372857	0.5818	0.103489	0.2883	0.0304684	0.4287	-0.00301277	0.5011	0.00954239	0.4571	0.0372924	0.3982	0.0155766	0.4475	-0.00906598	0.5219	0.107234	0.2126	0.00661257	0.4699	0.0122124	0.4709	-0.0167426	0.5366	-0.00858926	0.5181	-0.00160706	0.4932	0.0784092	0.3367
hsa-miR-6732-3p	-0.0275117	0.5849	-0.00284176	0.5013	0.00433367	0.4828	-0.0303319	0.5606	-0.0162838	0.5377	0.0735474	0.2922	-0.00749978	0.5123	0.0349797	0.358	0.0527956	0.3342	-0.00420836	0.5054	-0.0035243	0.5121	0.206252	0.1587	-0.00592128	0.5139	0.0532531	0.3697	0.160994	0.1046
hsa-miR-6737-3p	-0.018031	0.5311	0.148856	0.1653	-0.0171707	0.5416	0.0191386	0.4387	-0.0257956	0.5567	-0.025499	0.5531	-0.017329	0.5366	-0.00592623	0.5019	0.026046	0.4572	-0.0301484	0.5646	0.0445528	0.4161	-0.0364077	0.5769	-0.0409199	0.6036	-0.00800035	0.5198	0.0461522	0.3554
hsa-miR-6769b-3p	-0.0242146	0.5601	-0.00628185	0.5118	0.0496251	0.398	0.00633439	0.4674	0.000884081	0.4925	0.0639189	0.3002	-0.00855997	0.512	0.0101712	0.4596	0.0244358	0.4351	-0.0163867	0.5441	-0.018067	0.5482	0.0421077	0.3963	-0.0304901	0.5894	0.0407875	0.3892	0.128458	0.151
hsa-miR-6798-3p	-0.00692313	0.5147	0.0340106	0.4571	-0.0209799	0.5446	-0.0285148	0.554	0.0125791	0.486	0.251629	0.0368	0.00725845	0.4578	0.0453964	0.3851	0.0812546	0.266	-0.0214069	0.5495	0.0769151	0.2877	0.0836429	0.3362	-0.0402401	0.5712	0.152627	0.1179	0.0443987	0.3874
hsa-miR-6836-5p	0.0306986	0.4227	0.0741267	0.276	0.0787849	0.3404	0.0416997	0.3915	0.0808406	0.2703	0.138918	0.194	0.0374706	0.3514	0.144182	0.1097	0.117346	0.1493	0.0177255	0.4475	0.120479	0.1349	0.129122	0.3126	0.0604727	0.334	0.209906	0.0369	0.0289335	0.4405
hsa-miR-6837-3p	0.0339333	0.3961	0.0549252	0.3144	3.7098e-05	0.5026	-0.0204634	0.5524	-0.00387909	0.5065	0.090292	0.2113	0.0194105	0.4217	-0.0273238	0.5678	0.0644966	0.3311	-0.0391379	0.5492	0.0224558	0.4482	0.0162087	0.4755	-0.0316124	0.5952	-0.0058736	0.4997	-0.00640137	0.5106
hsa-miR-6842-3p	-0.000726018	0.4925	0.0782631	0.3122	0.0942217	0.2775	-0.0283414	0.5495	0.21746	0.0525	0.22697	0.1368	-0.0317576	0.5569	0.23267	0.0378	0.350694	0.0053	-0.0214134	0.5608	0.0572121	0.3814	0.149057	0.1707	0.0331334	0.4014	0.145754	0.2218	0.187008	0.1246
hsa-miR-6852-5p	-0.00699368	0.5204	0.0182541	0.4499	0.171906	0.0833	-0.0127233	0.5229	0.0523019	0.3378	0.227793	0.0384	-0.029982	0.5635	0.0424303	0.3617	0.377912	0.0019	-0.000298618	0.4953	0.0833118	0.2568	0.149333	0.1844	-0.0241465	0.5599	0.186161	0.0728	0.357796	0.0058
hsa-miR-7-1-3p	0.00928806	0.4781	0.022853	0.4372	0.25016	0.0666	-0.0362232	0.6063	0.0454824	0.3952	0.381552	0.0068	0.0136215	0.4259	0.0184061	0.4155	0.324731	0.0209	-0.0325077	0.5636	0.0875599	0.2542	0.206122	0.1158	-0.0298875	0.5834	0.123511	0.2609	0.460286	0.0007
hsa-miR-744-3p	-0.0240082	0.5414	0.0675998	0.3799	0.473092	0.0048	-0.0247395	0.5293	0.0642211	0.3186	0.543813	0.0008	-0.0343159	0.5684	0.0874968	0.2682	0.626935	0	0.00181964	0.4806	0.144432	0.2017	0.311531	0.0564	0.0137121	0.4487	0.51705	0	0.603036	0
hsa-miR-744-5p	-0.0298739	0.5559	0.192456	0.2264	0.535708	0.002	0.125486	0.3414	0.168374	0.1751	0.552317	0.0009	0.028243	0.4303	0.282791	0.1387	0.605545	0.0009	0.033711	0.4466	0.277615	0.0948	0.369194	0.0788	-0.00265442	0.5061	0.571518	0.0002	0.629631	0.0001
hsa-miR-766-3p	-0.0418821	0.5922	0.325301	0.0485	0.620862	0.0002	-0.0164145	0.542	0.421879	0.0138	0.687739	0	0.00235249	0.4963	0.506176	0.0002	0.763483	0	-0.0136569	0.5254	0.396442	0.0273	0.353188	0.0331	0.0496337	0.4384	0.713788	0	0.729559	0
hsa-miR-769-3p	-0.0149324	0.5413	0.012039	0.457	0.0267018	0.3918	0.0228077	0.4446	0.00348772	0.4858	0.087297	0.2368	-0.0154212	0.5382	0.032746	0.4047	0.125652	0.1479	-0.00472956	0.5112	0.0447511	0.4004	0.0107678	0.4722	-0.00407282	0.5059	0.0369844	0.4148	0.246134	0.0227
hsa-miR-769-5p	-0.0475204	0.5812	-0.0296543	0.5348	0.126996	0.3727	-0.0354868	0.5374	-0.0374908	0.5378	0.13855	0.2363	-0.0518944	0.5888	-0.0383611	0.5466	0.197867	0.2484	-0.048687	0.5854	0.0160634	0.4673	0.0918037	0.3905	-0.0665478	0.5727	0.0879344	0.3104	0.248778	0.0768
hsa-miR-7704	-0.0199511	0.5433	0.430216	0.0026	0.475239	0.0005	-0.0405977	0.566	0.34444	0.0121	0.459643	0.0045	0.0162802	0.4764	0.441581	0.001	0.455403	0.0102	-0.0401784	0.5903	0.393766	0.0037	0.280977	0.0641	0.0058223	0.4897	0.55946	0.0004	0.484592	0.0006
hsa-miR-7705	-0.0283393	0.5643	0.0241845	0.4695	0.413789	0.0093	-0.0193572	0.5532	0.0746817	0.3698	0.529126	0.0007	-0.0191908	0.5547	0.0267097	0.4539	0.61014	0.0003	0.0289413	0.4341	0.160187	0.1789	0.239097	0.1363	-0.049266	0.6127	0.346959	0.0235	0.578535	0.0007
hsa-miR-7706	-0.0498894	0.5962	-0.0169939	0.5234	0.115794	0.2695	-0.0519651	0.5749	-0.0462331	0.5612	0.201913	0.1336	-0.046358	0.5582	0.0299129	0.4475	0.360499	0.0225	-0.0253467	0.5442	-0.00691757	0.5168	0.109103	0.2588	0.012099	0.4688	0.0165129	0.441	0.32511	0.0467
hsa-miR-7976	0.0364568	0.4198	0.00859659	0.4881	-0.00402947	0.5104	-0.0044339	0.51	-0.0191848	0.545	-0.00585612	0.5027	0.00480722	0.4923	0.0221398	0.4352	-0.0316841	0.5754	-0.0386096	0.5764	0.0501954	0.3202	-0.0280856	0.5631	-0.00140948	0.4895	0.0160945	0.4429	0.0186803	0.431
hsa-miR-7977	0.0180053	0.4738	-0.00016725	0.5055	0.0143035	0.4725	-0.0520967	0.5893	-0.0232086	0.5339	0.0832552	0.3724	0.153544	0.3414	0.00849938	0.4797	0.129393	0.2261	-0.0406579	0.5775	0.00132715	0.4996	0.00505193	0.4951	-0.0253062	0.5439	0.00834503	0.4876	0.0478619	0.395
hsa-miR-874-3p	-0.0151681	0.5278	0.100198	0.2208	0.447323	0.0032	-0.000518638	0.4962	0.187715	0.0546	0.534258	0.0005	-0.0136922	0.5265	0.288775	0.0097	0.597809	0.0001	-0.00117404	0.4946	0.170598	0.1421	0.262008	0.0792	-0.0226022	0.5455	0.347943	0.0151	0.621242	0.0002
hsa-miR-877-5p	0.0125938	0.4467	0.00848375	0.4819	0.118603	0.212	-0.0211255	0.5476	0.0156447	0.4543	0.253421	0.0364	0.0665812	0.2683	0.00173863	0.4934	0.337184	0.0153	-0.0163425	0.5352	0.0703739	0.343	0.105244	0.2495	0.0122464	0.456	0.167445	0.0875	0.286736	0.0272
hsa-miR-92a-1-5p	-0.0180505	0.5381	-0.025417	0.5695	-0.0293733	0.5604	-0.0358682	0.5843	0.00330599	0.4754	0.0258653	0.4161	0.00855318	0.4805	0.0493954	0.3611	0.176271	0.2239	-0.0241966	0.549	0.109319	0.2798	-0.00406682	0.5038	-0.00580542	0.51	0.142851	0.1755	0.0241245	0.4305
hsa-miR-92b-3p	-0.0393214	0.5741	0.564672	0.003	0.747043	0	-0.0456636	0.5889	0.364357	0.0509	0.771855	0	-0.0331488	0.5751	0.438011	0.0176	0.790983	0	-0.044166	0.5761	0.458691	0.0581	0.574059	0.0082	-0.0319791	0.5848	0.749136	0	0.766746	0
hsa-miR-92b-5p	-0.00182511	0.5034	-0.00709328	0.5117	0.101568	0.2397	-0.01579	0.5161	0.00977633	0.4457	0.133569	0.1917	0.00429209	0.4815	-0.00782917	0.5162	0.145004	0.213	-0.0172411	0.5357	-0.0161171	0.5365	0.0652093	0.2674	-0.0389109	0.5781	0.00593668	0.4626	0.158186	0.1299
hsa-miR-93-3p	-0.0132434	0.5284	0.0452713	0.3467	-0.00150954	0.492	-0.0143535	0.526	-0.0206867	0.5492	0.0040221	0.4936	-0.0089348	0.5164	0.00803848	0.4702	0.0119385	0.4597	-0.00527971	0.5091	0.00832525	0.4738	-0.0187299	0.5516	-0.0316082	0.552	0.0356115	0.3617	0.0250503	0.412
hsa-miR-93-5p	-0.0197914	0.5447	0.0729219	0.3261	0.469127	0.0049	-0.0544434	0.6045	0.0749723	0.278	0.530522	0.0009	0.0314406	0.4214	0.149725	0.2272	0.666671	0.0002	-0.0420882	0.5672	0.151791	0.2032	0.264389	0.0973	-0.0532835	0.62	0.394484	0.007	0.644684	0.0011
hsa-miR-940	-0.0299773	0.5688	0.271474	0.0201	0.334547	0.0066	-0.0169921	0.5286	0.194884	0.0741	0.280211	0.0969	-0.0234382	0.5483	0.203246	0.1504	0.336433	0.0072	-0.0224473	0.5425	0.218007	0.085	0.297604	0.0248	-0.0153538	0.5423	0.332157	0.017	0.280588	0.067
hsa-miR-942-5p	-0.0128127	0.5233	-0.0231133	0.5408	0.0678363	0.2672	-0.0163953	0.5292	-0.0249335	0.5717	0.154866	0.1035	0.0483244	0.3272	-0.0189799	0.5466	0.205158	0.0398	-0.0206683	0.5383	-0.00701431	0.514	0.0392968	0.4095	-0.0229431	0.565	0.0289173	0.3756	0.221472	0.0433
hsa-miR-98-3p	-0.0185382	0.5435	0.247626	0.1506	0.471577	0.0111	0.0317408	0.4614	0.192567	0.2147	0.690099	0	-0.0405093	0.585	0.241103	0.1134	0.70835	0	-0.0402938	0.5794	0.273132	0.0829	0.398654	0.022	-0.0234163	0.5337	0.683686	0	0.657987	0.0001
hsa-miR-98-5p	-0.0565328	0.594	-0.0336834	0.5311	0.20298	0.3014	-0.0766457	0.5762	-0.052475	0.5556	0.33572	0.0616	-0.0544889	0.5858	-0.0375665	0.5378	0.422394	0.0695	-0.0570777	0.5928	0.0954821	0.298	0.163408	0.319	-0.0759002	0.5805	0.176016	0.1844	0.554199	0.0037
hsa-miR-99a-3p	0.125266	0.1826	0.0140057	0.4682	0.147342	0.1782	0.0481549	0.4174	0.0980645	0.2354	0.332204	0.0204	0.0697631	0.3231	0.128164	0.2857	0.475815	0.0012	0.00828001	0.4877	0.0190159	0.4412	0.209446	0.1707	0.0184797	0.4683	0.113929	0.2231	0.469709	0.0011
hsa-miR-99a-5p	0.0132383	0.4923	-0.0443058	0.5506	0.0882554	0.4172	0.00723666	0.4834	-0.0428171	0.5724	0.25742	0.1027	-0.0546696	0.5876	-0.0488868	0.5761	0.290043	0.0462	-0.0606762	0.6114	-0.0133681	0.5194	0.0911869	0.3109	-0.0646081	0.5691	0.00714477	0.4989	0.327914	0.0409
hsa-miR-99b-3p	-0.00161038	0.5075	0.0150143	0.4497	0.10924	0.1502	0.00194148	0.5073	0.0425401	0.3684	0.174449	0.0889	0.00284815	0.4655	0.0303792	0.3757	0.256652	0.0445	0.0166981	0.4393	0.053365	0.351	0.0704622	0.3245	0.0137069	0.4448	0.0783251	0.2455	0.255417	0.0729
hsa-miR-99b-5p	-0.0054527	0.5091	0.102581	0.3477	0.530139	0.0007	-0.0527574	0.5718	0.0818249	0.2917	0.619092	0.0001	-0.0424052	0.5807	0.0878822	0.2642	0.678517	0.004	-0.0566502	0.6183	0.172555	0.1354	0.321965	0.1117	-0.0536856	0.5765	0.383578	0.0722	0.619572	0.0009
